# Supplementary material for: Harnessing bi-exosome synergy alleviates osteoarthritis progression
Source: Research Square preprint supplement (doi:10.21203/rs.3.rs-6960485/v1), 2025-07-02

Supplementary Table 1. Antibodies used for FC, WB, IF and IHC-P.

| Antibody | Company | Code | Application |
| --- | --- | --- | --- |
| FITC-conjugated CD29 | BioLegend | 102205 | FC |
| BV421-conjugated CD90 | BioLegend | 202529 | FC |
| PE-conjugated CD45 | BioLegend | 202207 | FC |
| APC-conjugated CD11b | BD Pharmingen | 562102 | FC |
| FITC-conjugated CD68 | Thermo Fisher Scientific | MA528262 | FC |
| FITC-conjugated IgG Isotype Ctrl | BioLegend | 400905 | FC |
| BV421-conjugated IgG1, κ Isotype Ctrl | BioLegend | 400158 | FC |
| PE-conjugated IgG1, κ Isotype Ctrl | BioLegend | 981804 | FC |
| APC-conjugated IgA, κ Isotype Ctrl | BD Pharmingen | 562140 | FC |
| FITC-conjugated IgG1 Isotype Ctrl | Thermo Fisher Scientific | MA518096 | FC |
| CD63 | Thermo Fisher Scientific | PA5-92370 | WB |
| TSG101 | Merck | AV38773 | WB |
| CALNEXIN | Novus Biologicals | NB100-1965 | WB |
| iNOS | Proteintech | 18985-1-AP | WB, IF |
| ARG-1 | Proteintech | 66129-1-Ig | WB, IF |
| SOX-9 | HuaBio | ET1611-56 | WB |
| BCL-2 | HuaBio | ET1702-53 | WB |
| CD86 | Proteintech | 13395-1-AP | WB |
| CD206 | Proteintech | 18704-1-AP | WB |
| NOTCH-3 | Abmart | TA7548S | WB |
| NRP-1 | HuaBio | ET1609-69 | WB |
| BRCA-1 | Proteintech | 22362-1-AP | WB |
| β-actin | Proteintech | 66009-1-Ig | WB |
| HRP-conjugated Goat Anti-Mouse IgG | Proteintech | SA00001-1 | WB |
| HRP-conjugated Goat Anti-Rabbit IgG | Proteintech | SA00001-2 | WB |
| Cleaved Caspase-3 | Cell Signaling Technology | 9661S | IF |
| CD86 | Thermo Fisher Scientific | 942-MSM2-P1ABX | IF |
| CD206 | Abcam | ab64693 | IF |
| Goat Anti-Mouse IgG (Alexa Fluor 488) | Abcam | ab150117 | IF |
| Goat Anti-Rabbit IgG (Alexa Fluor 555) | Abcam | ab150086 | IF |
| Collagen II | Abcam | ab34712 | IHC-P |
| Goat Anti-Rabbit IgG (HRP) | Abcam | ab97080 | IHC-P |

Supplementary Table 2. The sequences of primers for qRT-PCR.

| Gene | Primer sequence (forward primers) | Primer sequence (reverse primers) |
| --- | --- | --- |
| *Sox-9* | CATCAAGACGGAGCAACTGA | TGTAGTGCGGAAGGTTGAAG |
| *Col-II* | CTCAAGTCGCTGAACAACCA | GTCTCCGCTCTTCCACTCTG |
| *Acan* | TGGCATTGAGGACAGCGAAG | TCCAGTGTGTAGCGTGTGGAAATAG |
| *MMP-13* | CTATGGTCCAGGAGATGAAGAC | GTGCAGACGCCAGAAGAATCT |
| *Bcl-2* | GGGATGCCTTTGTGGAACTA | CTCACTTGTGGCCCAGGTAT |
| *Bax* | GCGATGAACTGGACAACAACAT | TAGCAAAGTAGAAAAGGGCAACC |
| *iNOS* | CCTGGTGCAAGGGATCTTGG | GAGGGCTTGCCTGAGTGAGC |
| *CD86* | TCCTCCAGCAGTGGGAAACA | TTTGTAGGTTTCGGGTATCCTTGC |
| *CD163* | CTCAGCGTCTCTGCTGTCAC | GGCCAGTCTCAGTTCCTTCTT |
| *IL-10* | CAAGGCAGTGGAGCAGGTGA | CCGGGTGGTTCAATTTTTCATT |
| *TNF-α* | TTCCCAAATGGGCTCCCTCT | GTGGGCTACGGGCTTGTCAC |
| *Plk-1* | CAGTACCTGCACCGCAATCAAG | CCGTTCCCCTTCATATTCCACTTTT |
| *GAPDH* | GGTCGGTGTGAACGGATTTGG | GCCGTGGGTAGAGTCATACTGGAAC |

Supplementary Table 3. The sequences of miRNA mimics.

| miRNA mimics | Sense | Antisense |
| --- | --- | --- |
| miR-7a-5p | UGGAAGACUAGUGAUUUUGUUGU | ACAACAAAAUCACUAGUCUUCCA |
| miR-708-5p | AAGGAGCUUACAAUCUAGCUGGG | CCCAGCUAGAUUGUAAGCUCCUU |
| miR-431 | UGUCUUGCAGGCCGUCAUGCA | UGCAUGACGGCCUGCAAGACA |
| NC | UCACAACCUCCUAGAAAGAGUAGA | UCUACUCUUUCUAGGAGGUUGUGA |

The original images of western blot.


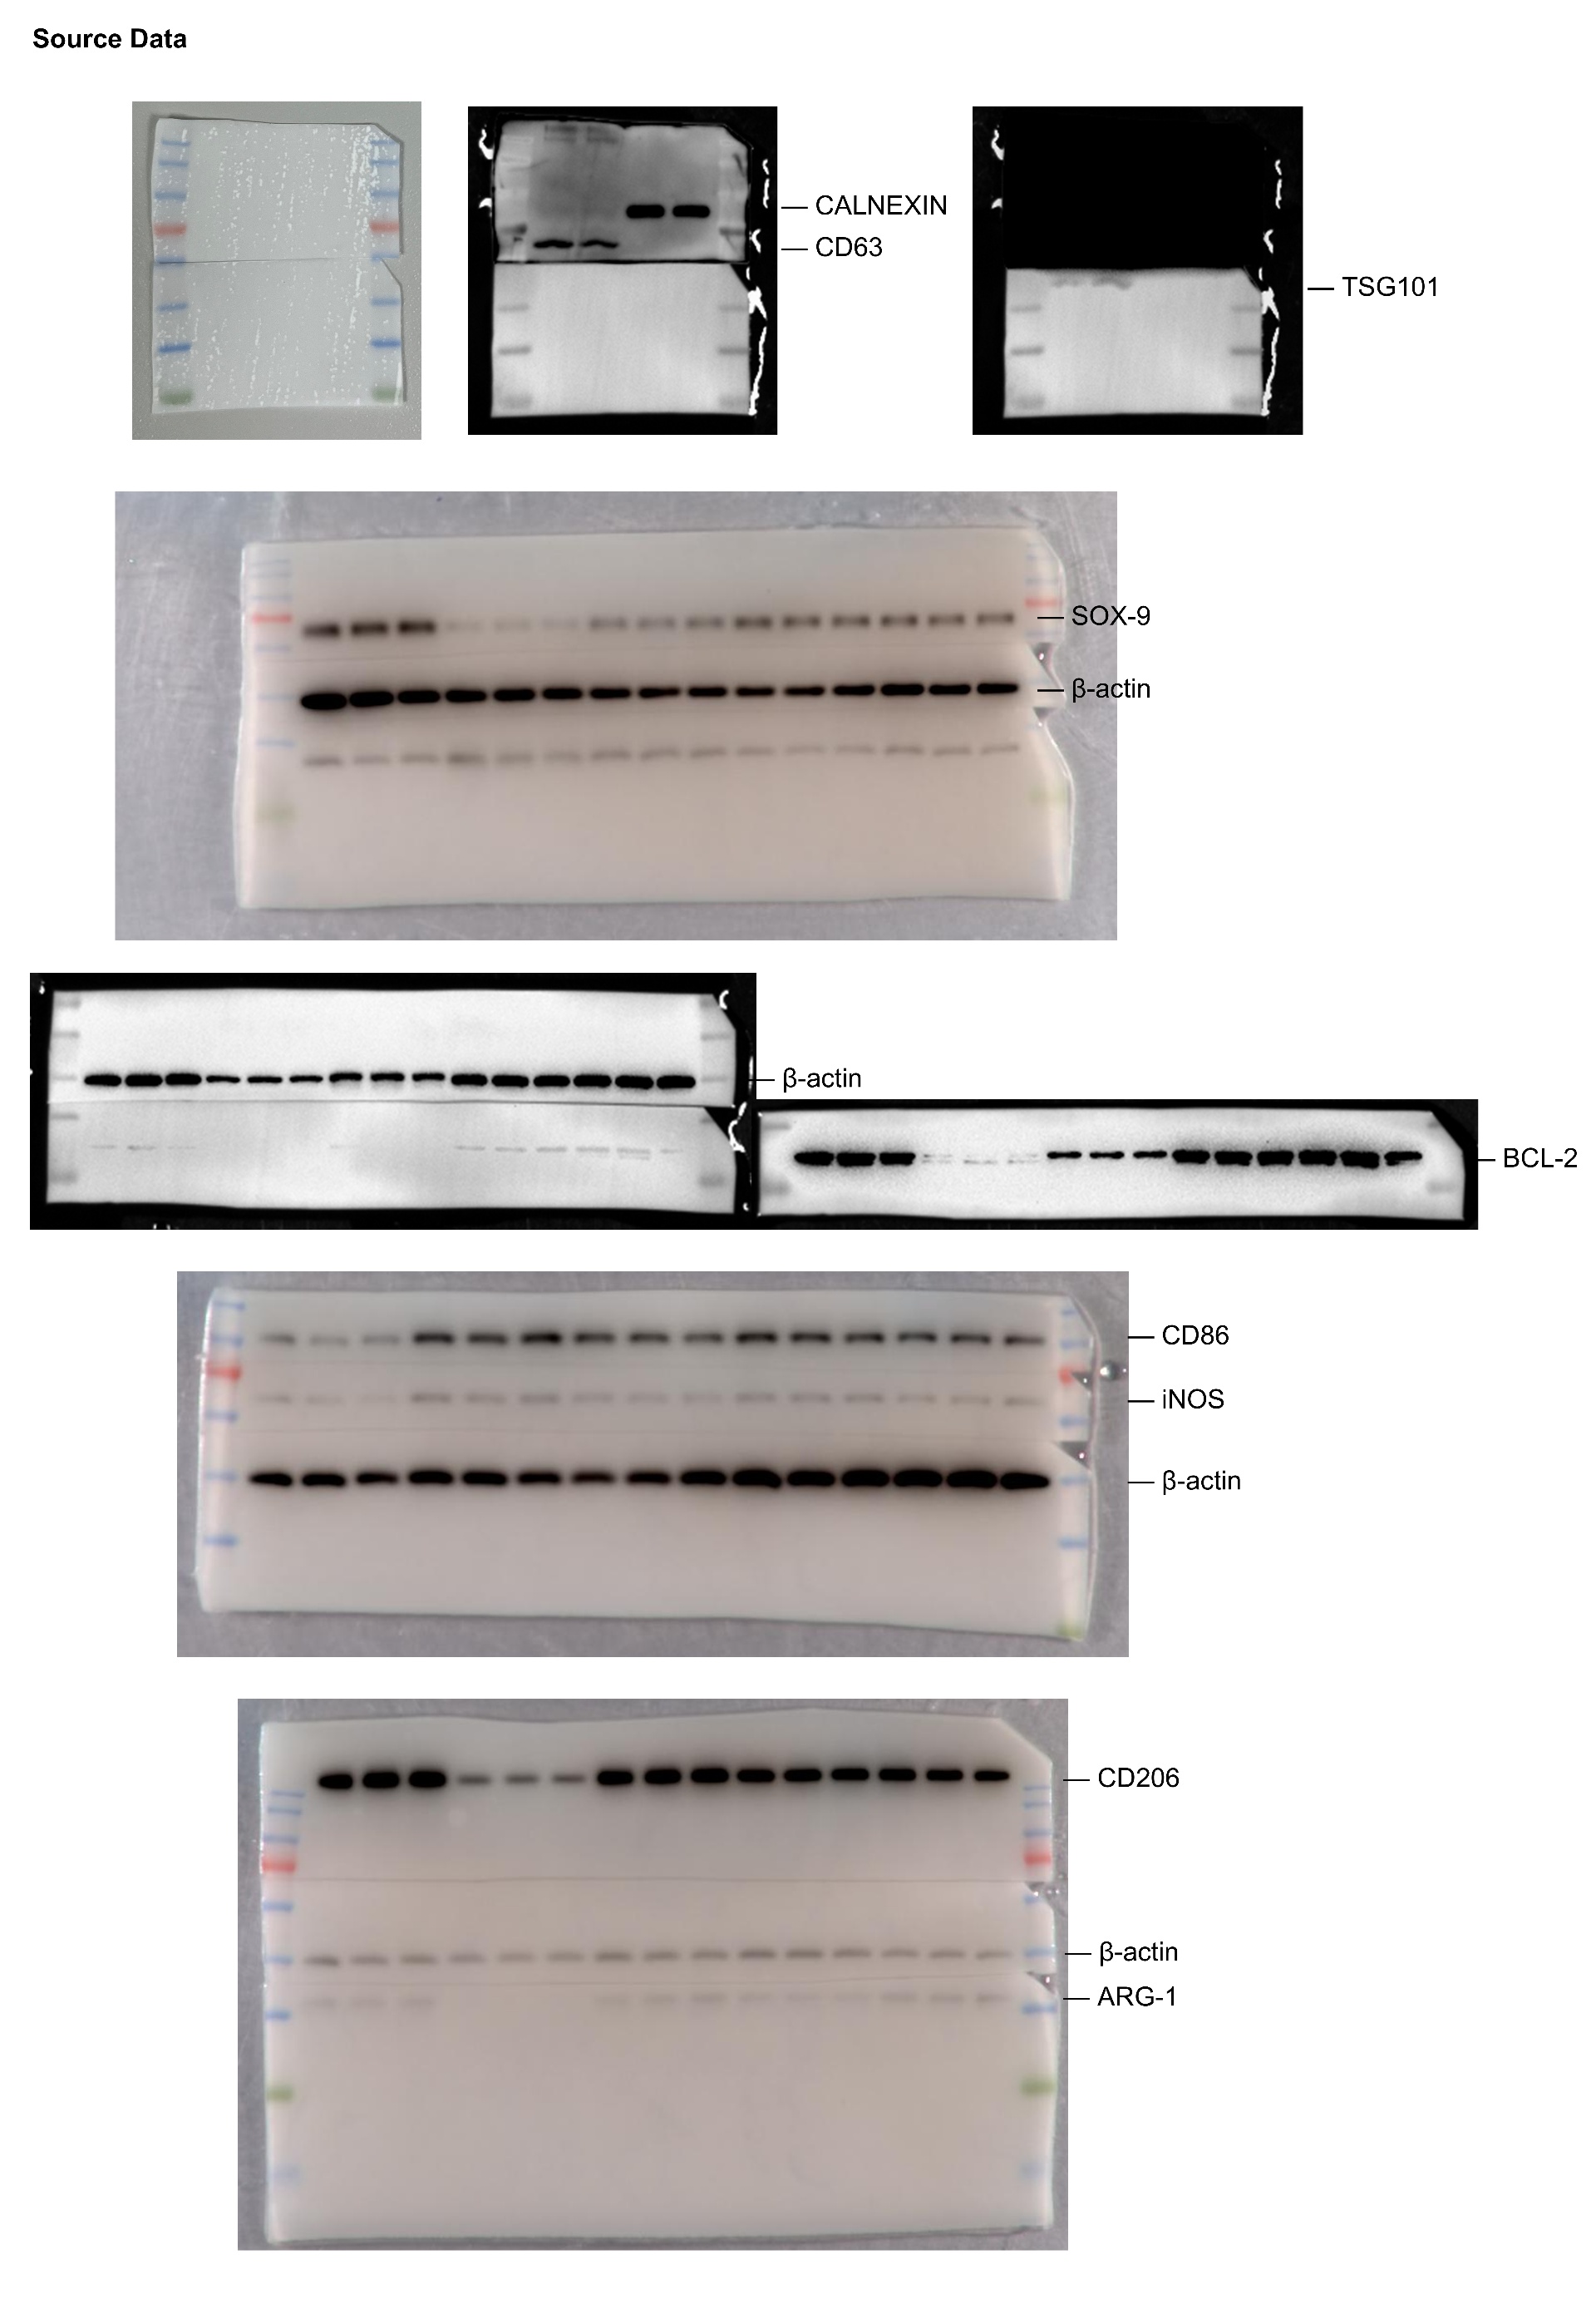


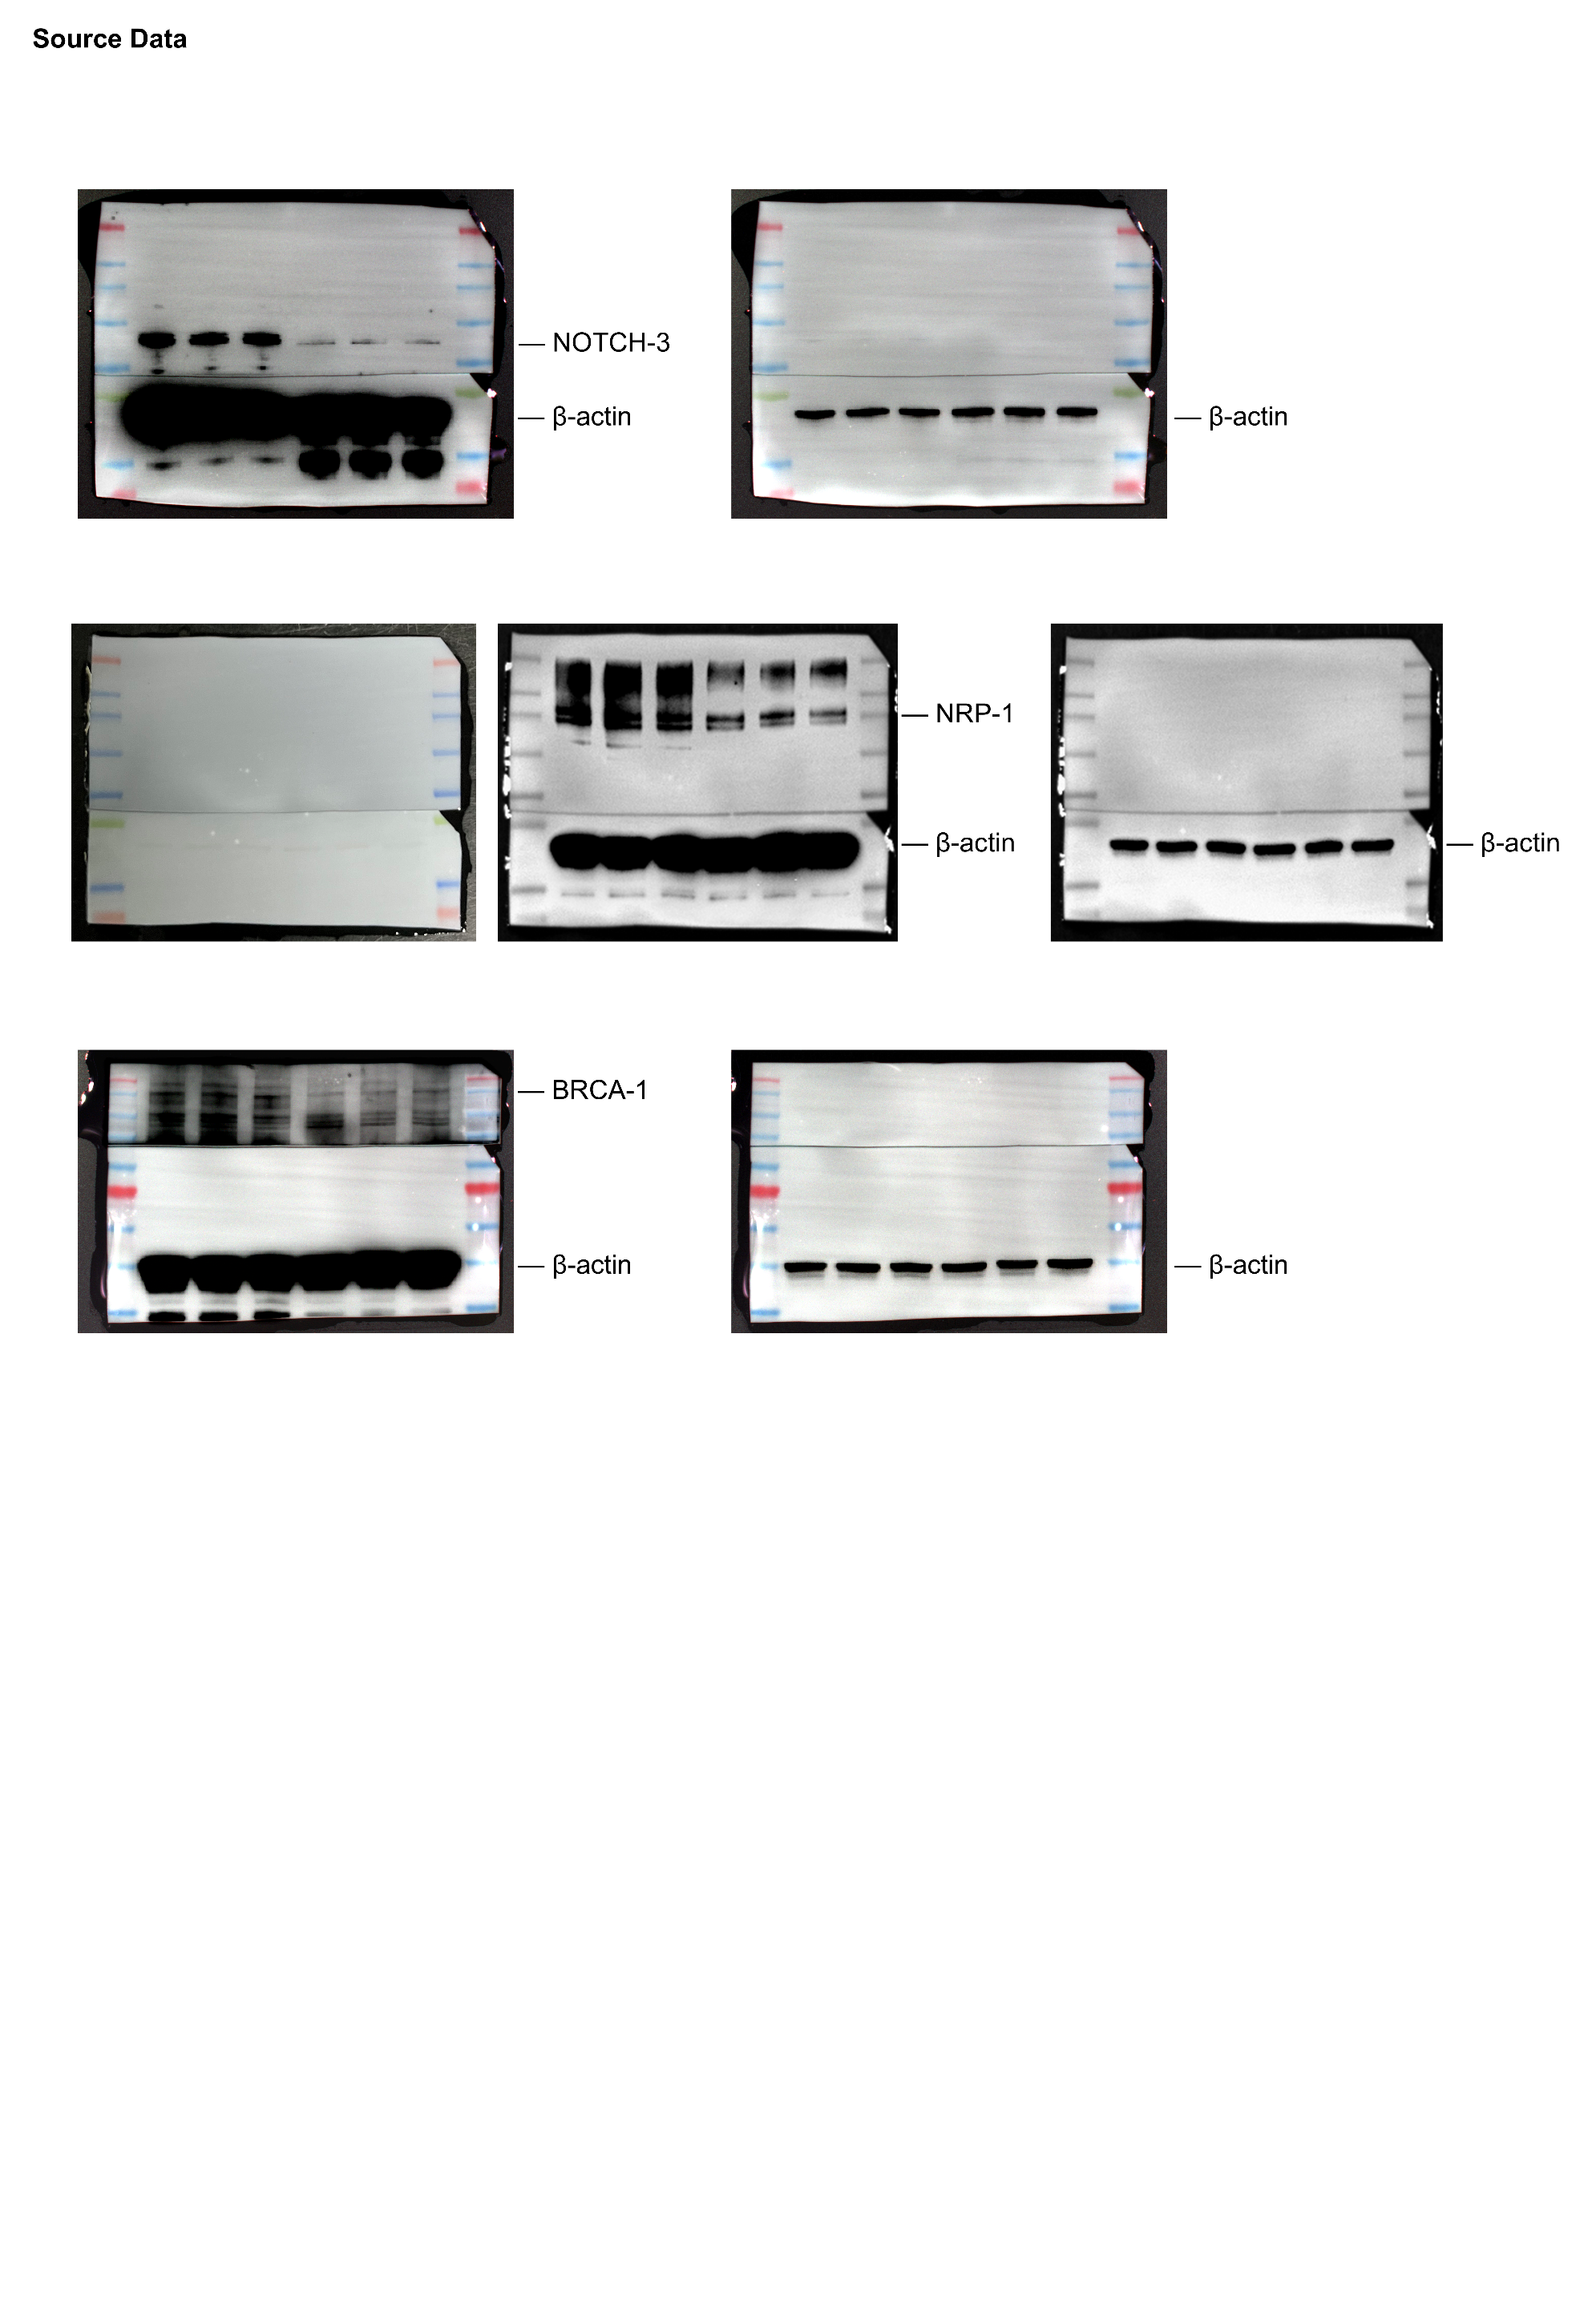

Supplement: Supplementary file 2 [file b17413a81ac84edb9c10aeb0.docx]
