# Supplementary material for: Harnessing bi-exosome synergy alleviates osteoarthritis progression
Source: Research Square preprint supplement (doi:10.21203/rs.3.rs-6960485/v1), 2025-07-02
Supplement: Supplementary file 1 [file 47152d1332deee110f948f2a.docx]

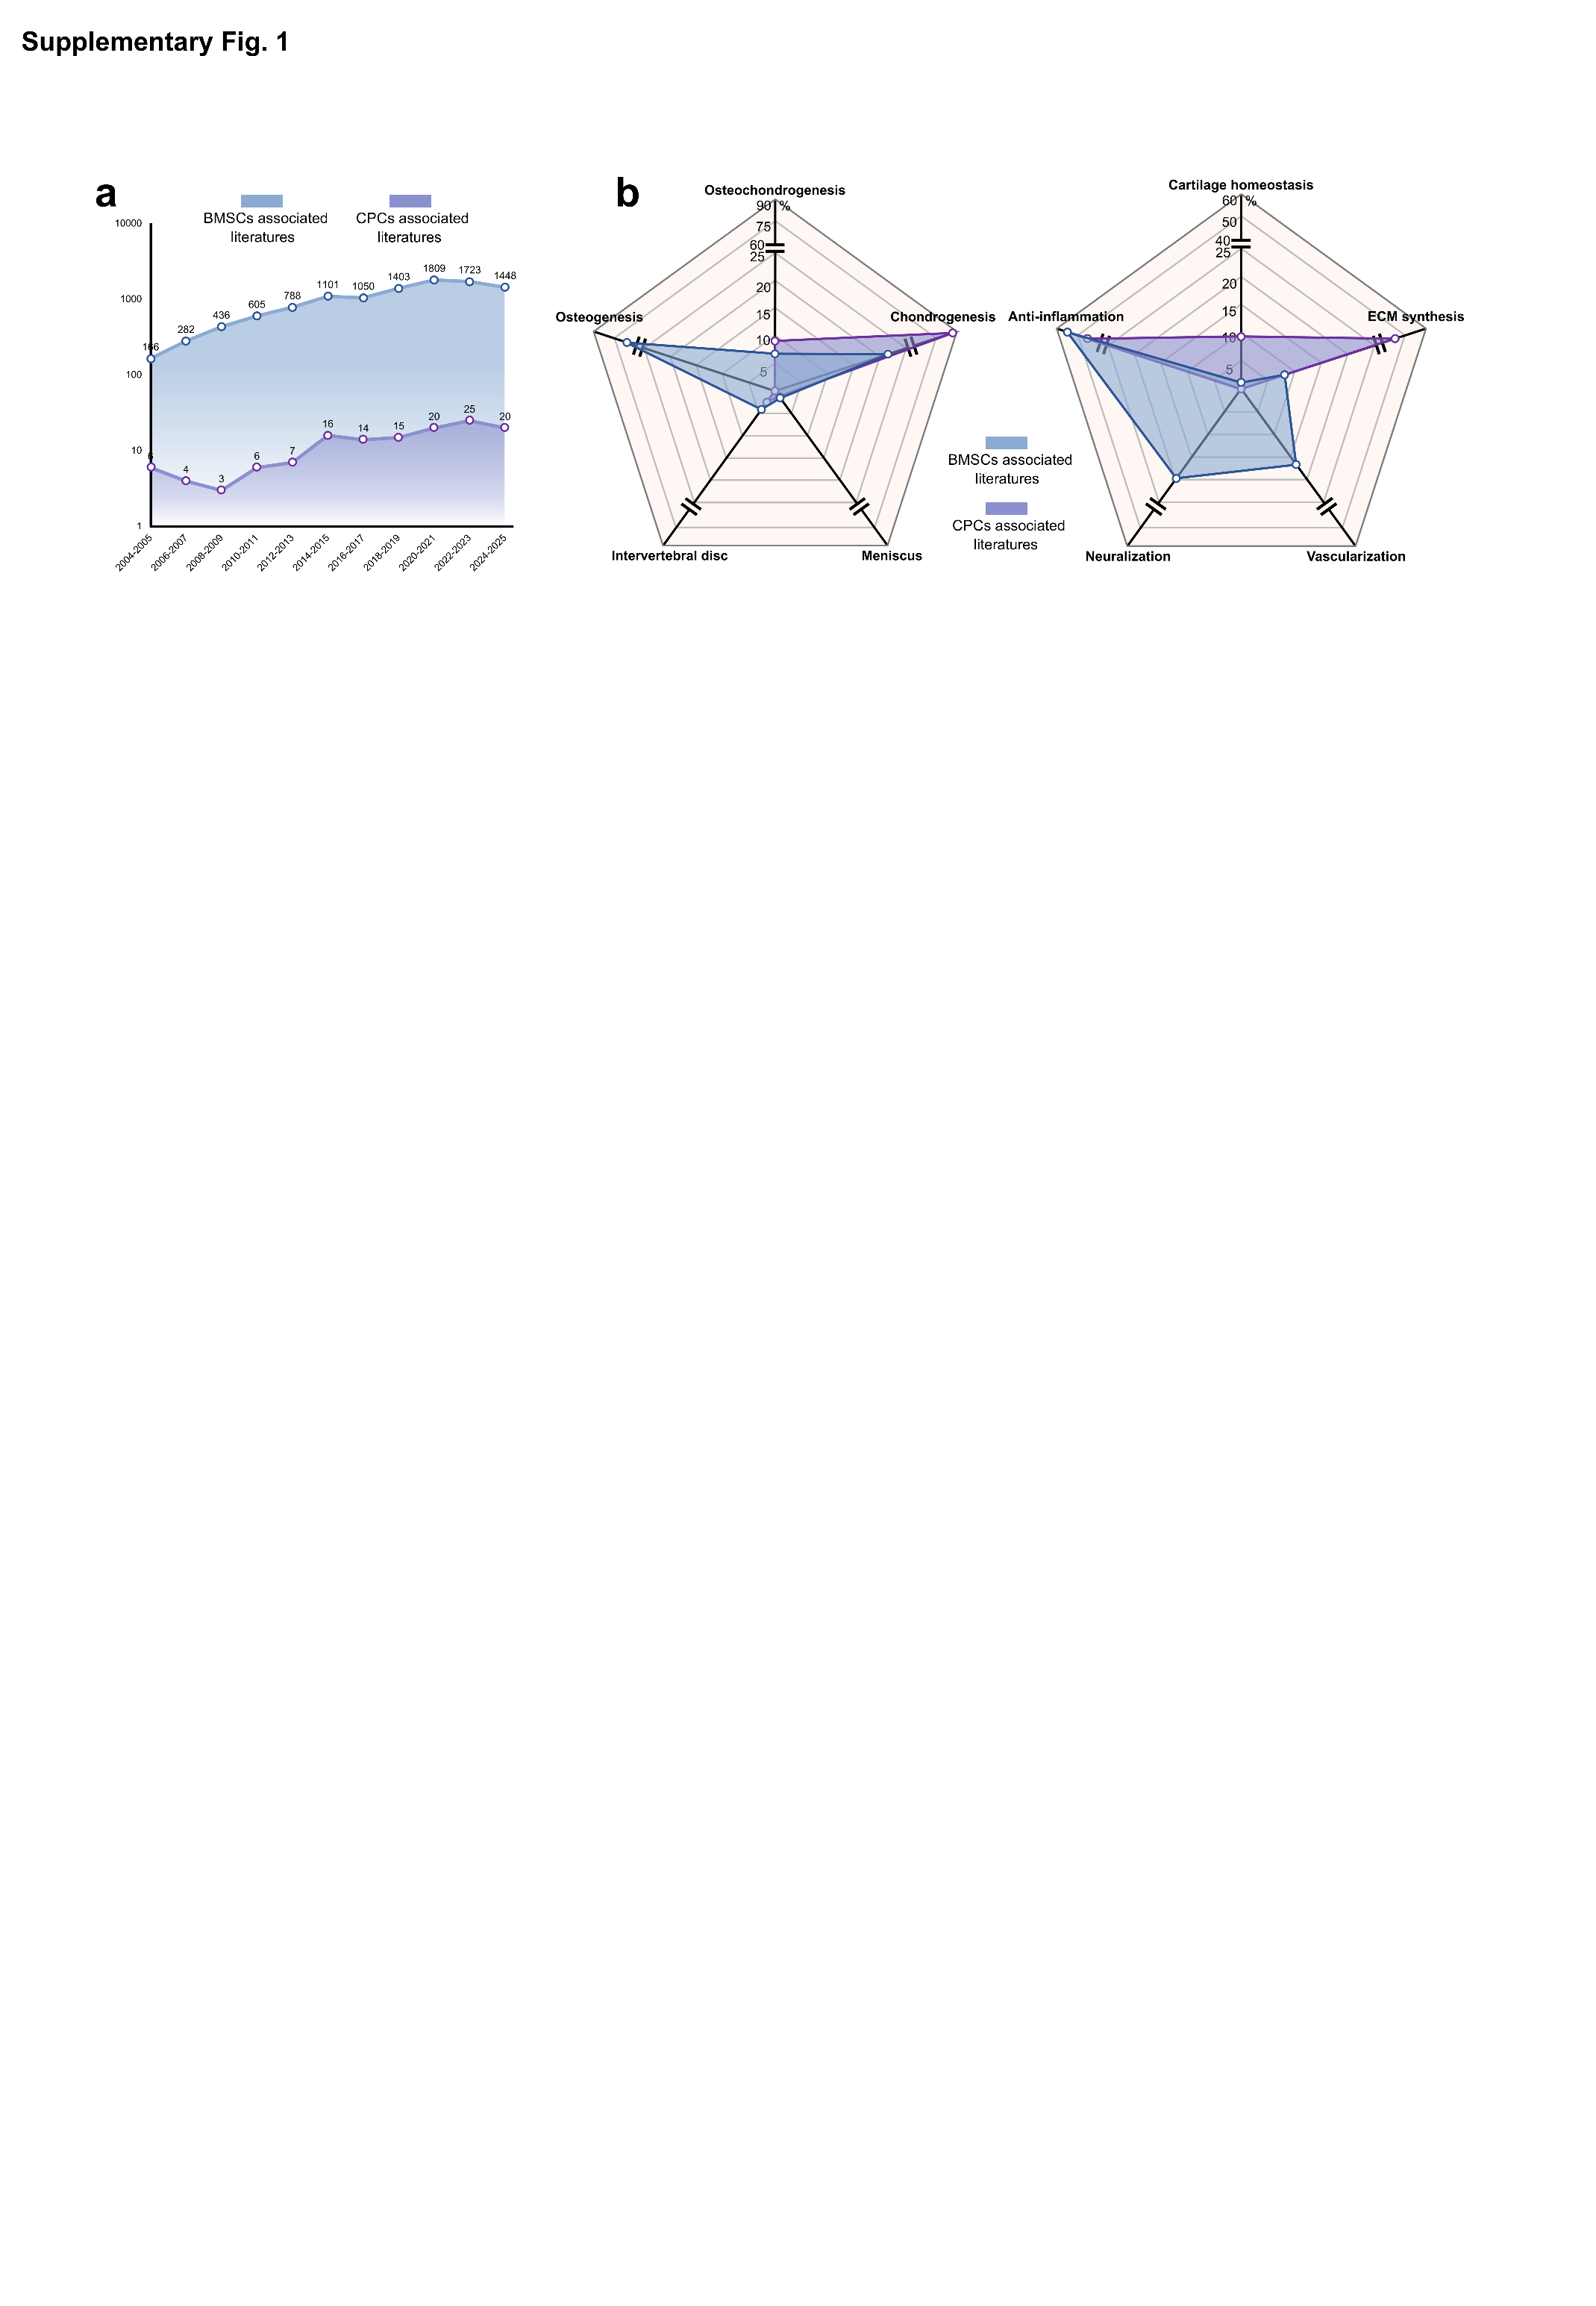
**Supplementary Fig. 1 | Summary of publications of BMSCs and CPCs related to skeleton repair**. **a** The number of relevant literatures from 2004 to 2025. **b** The literatures classified according to the repair sites and biological functions.


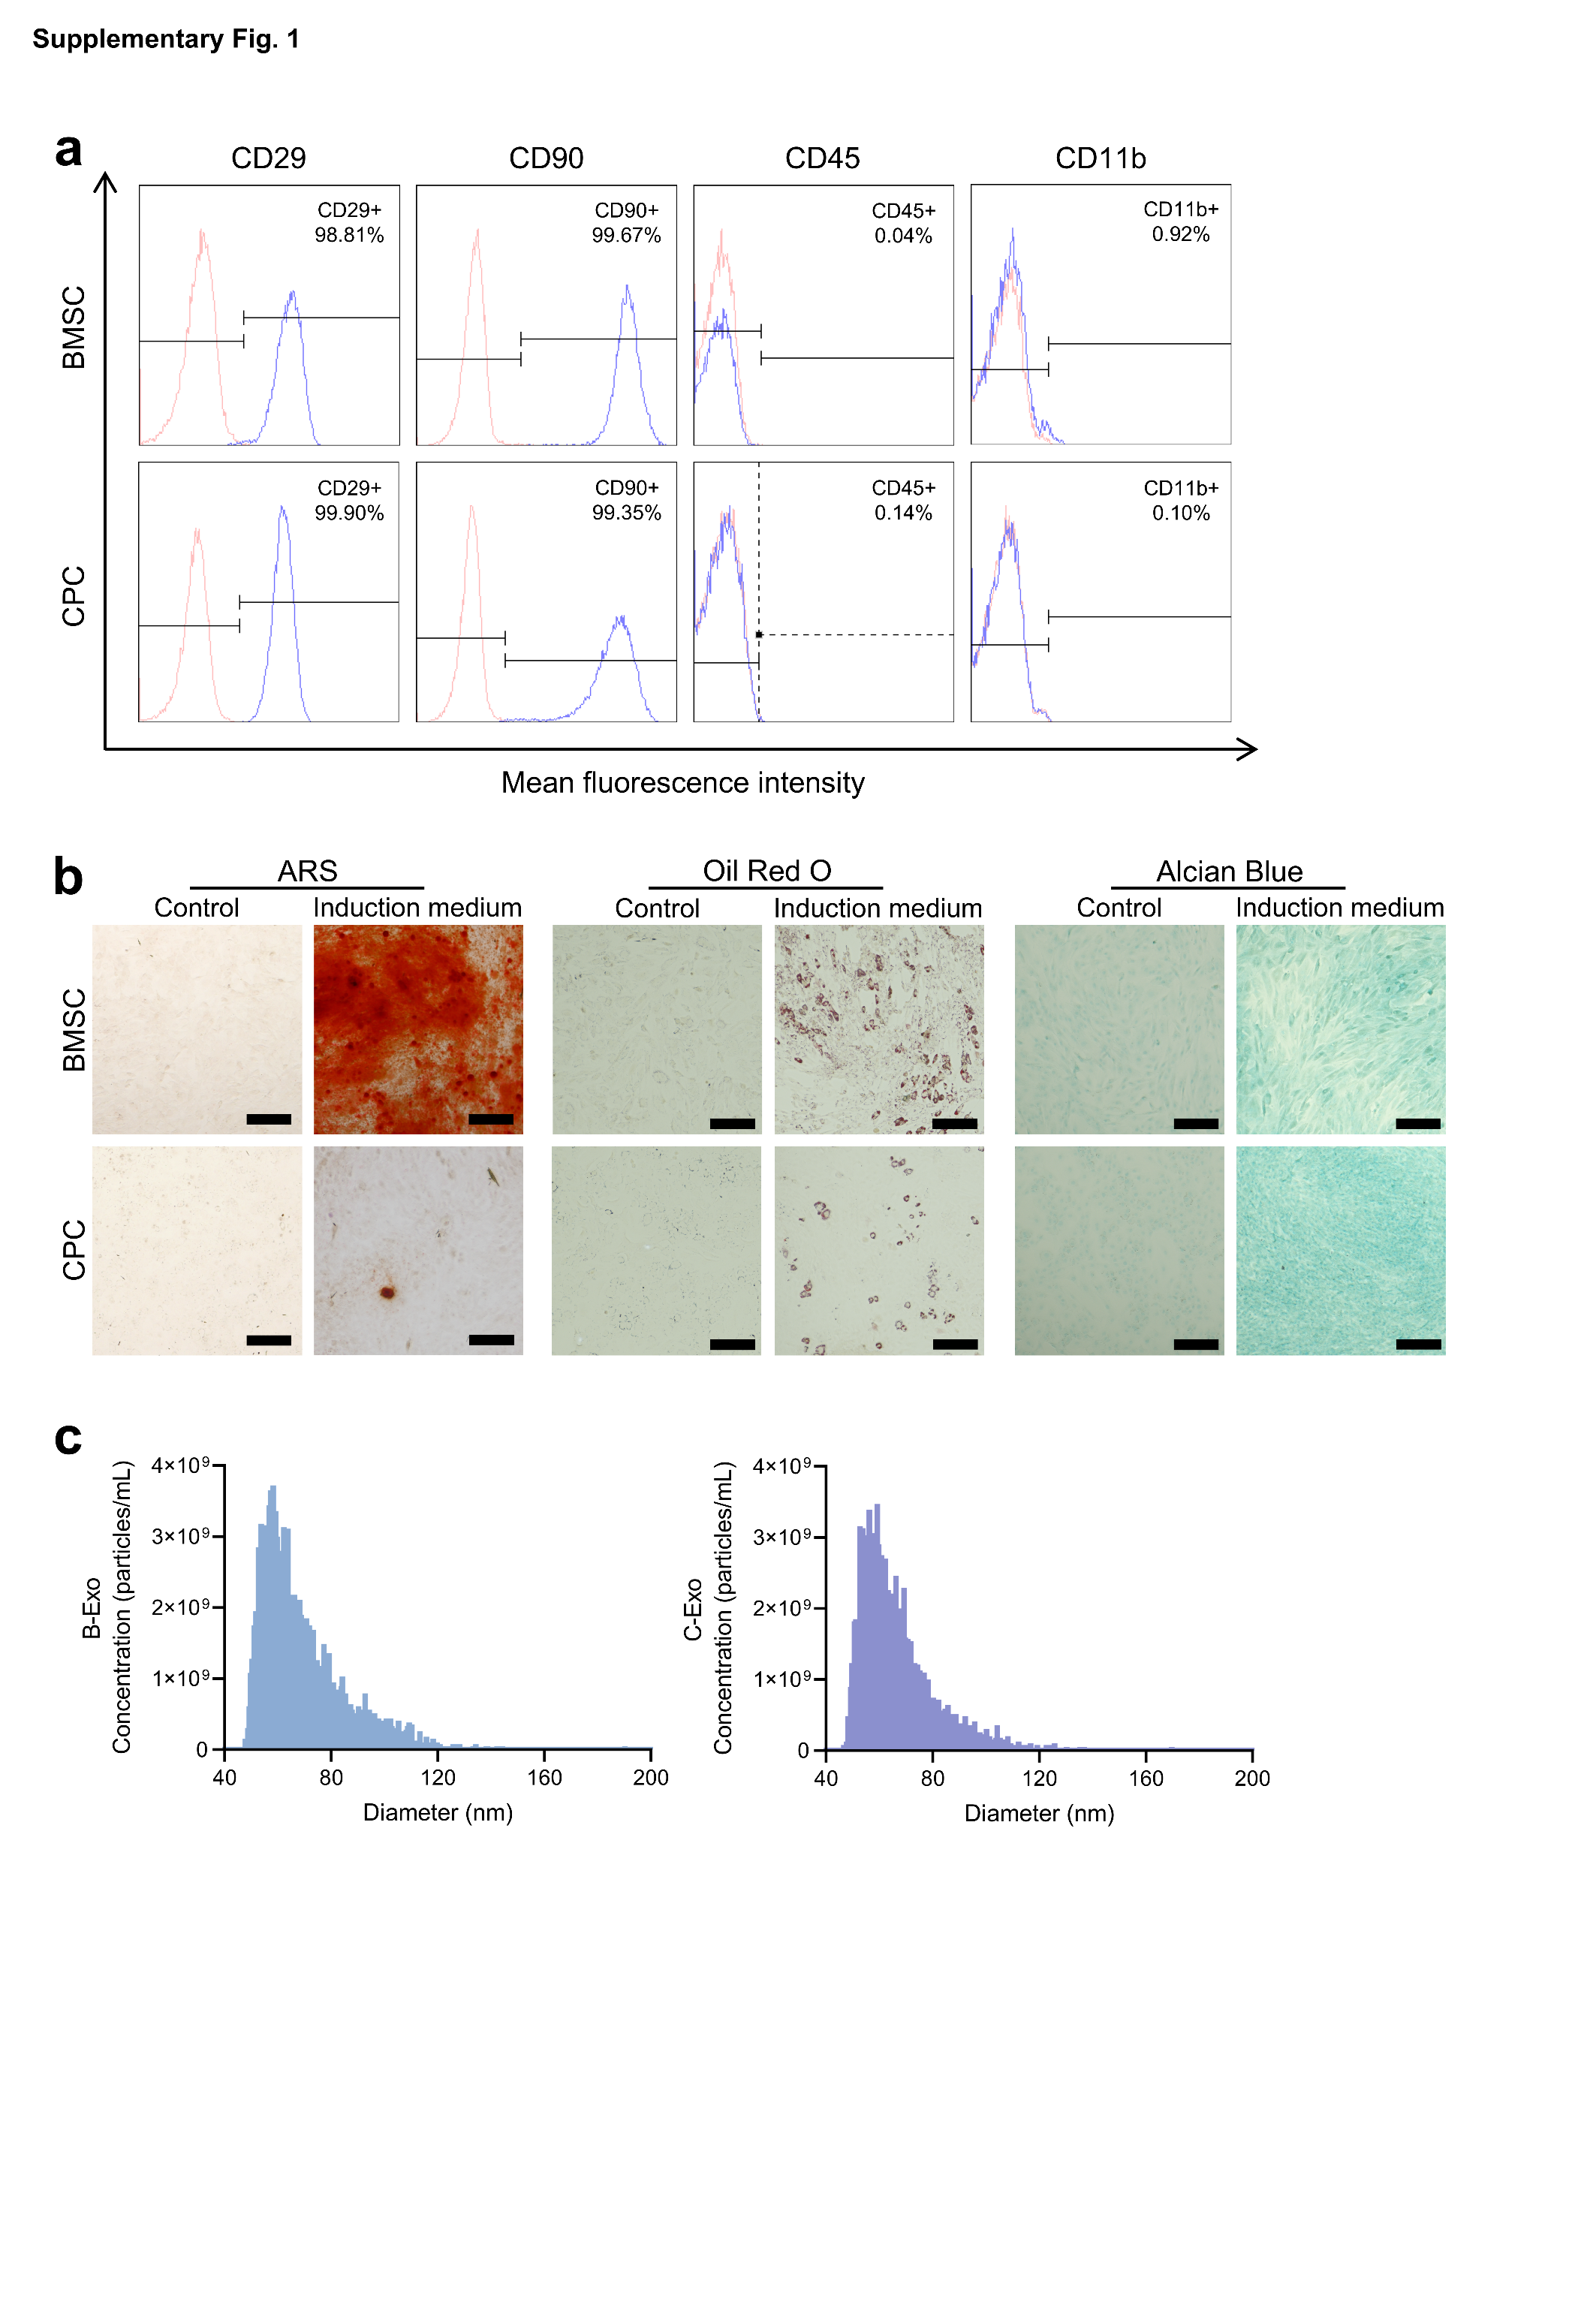


**Supplementary Fig. 2 | Characterization of BMSCs, CPCs, and Exo. a** Flow cytometric identification of CD29, CD90, CD45, and CD11b positive population in BMSCs and CPCs, respectively. **b** Representative images of osteogenesis by ARS staining, adipogenesis by Oil Red O staining, and chondrogenesis by Alcian Blue staining, scale bar: 200 μm. **c** Representative particle size and concentration distributions of B-Exo and C-Exo, respectively, measured via NTA.


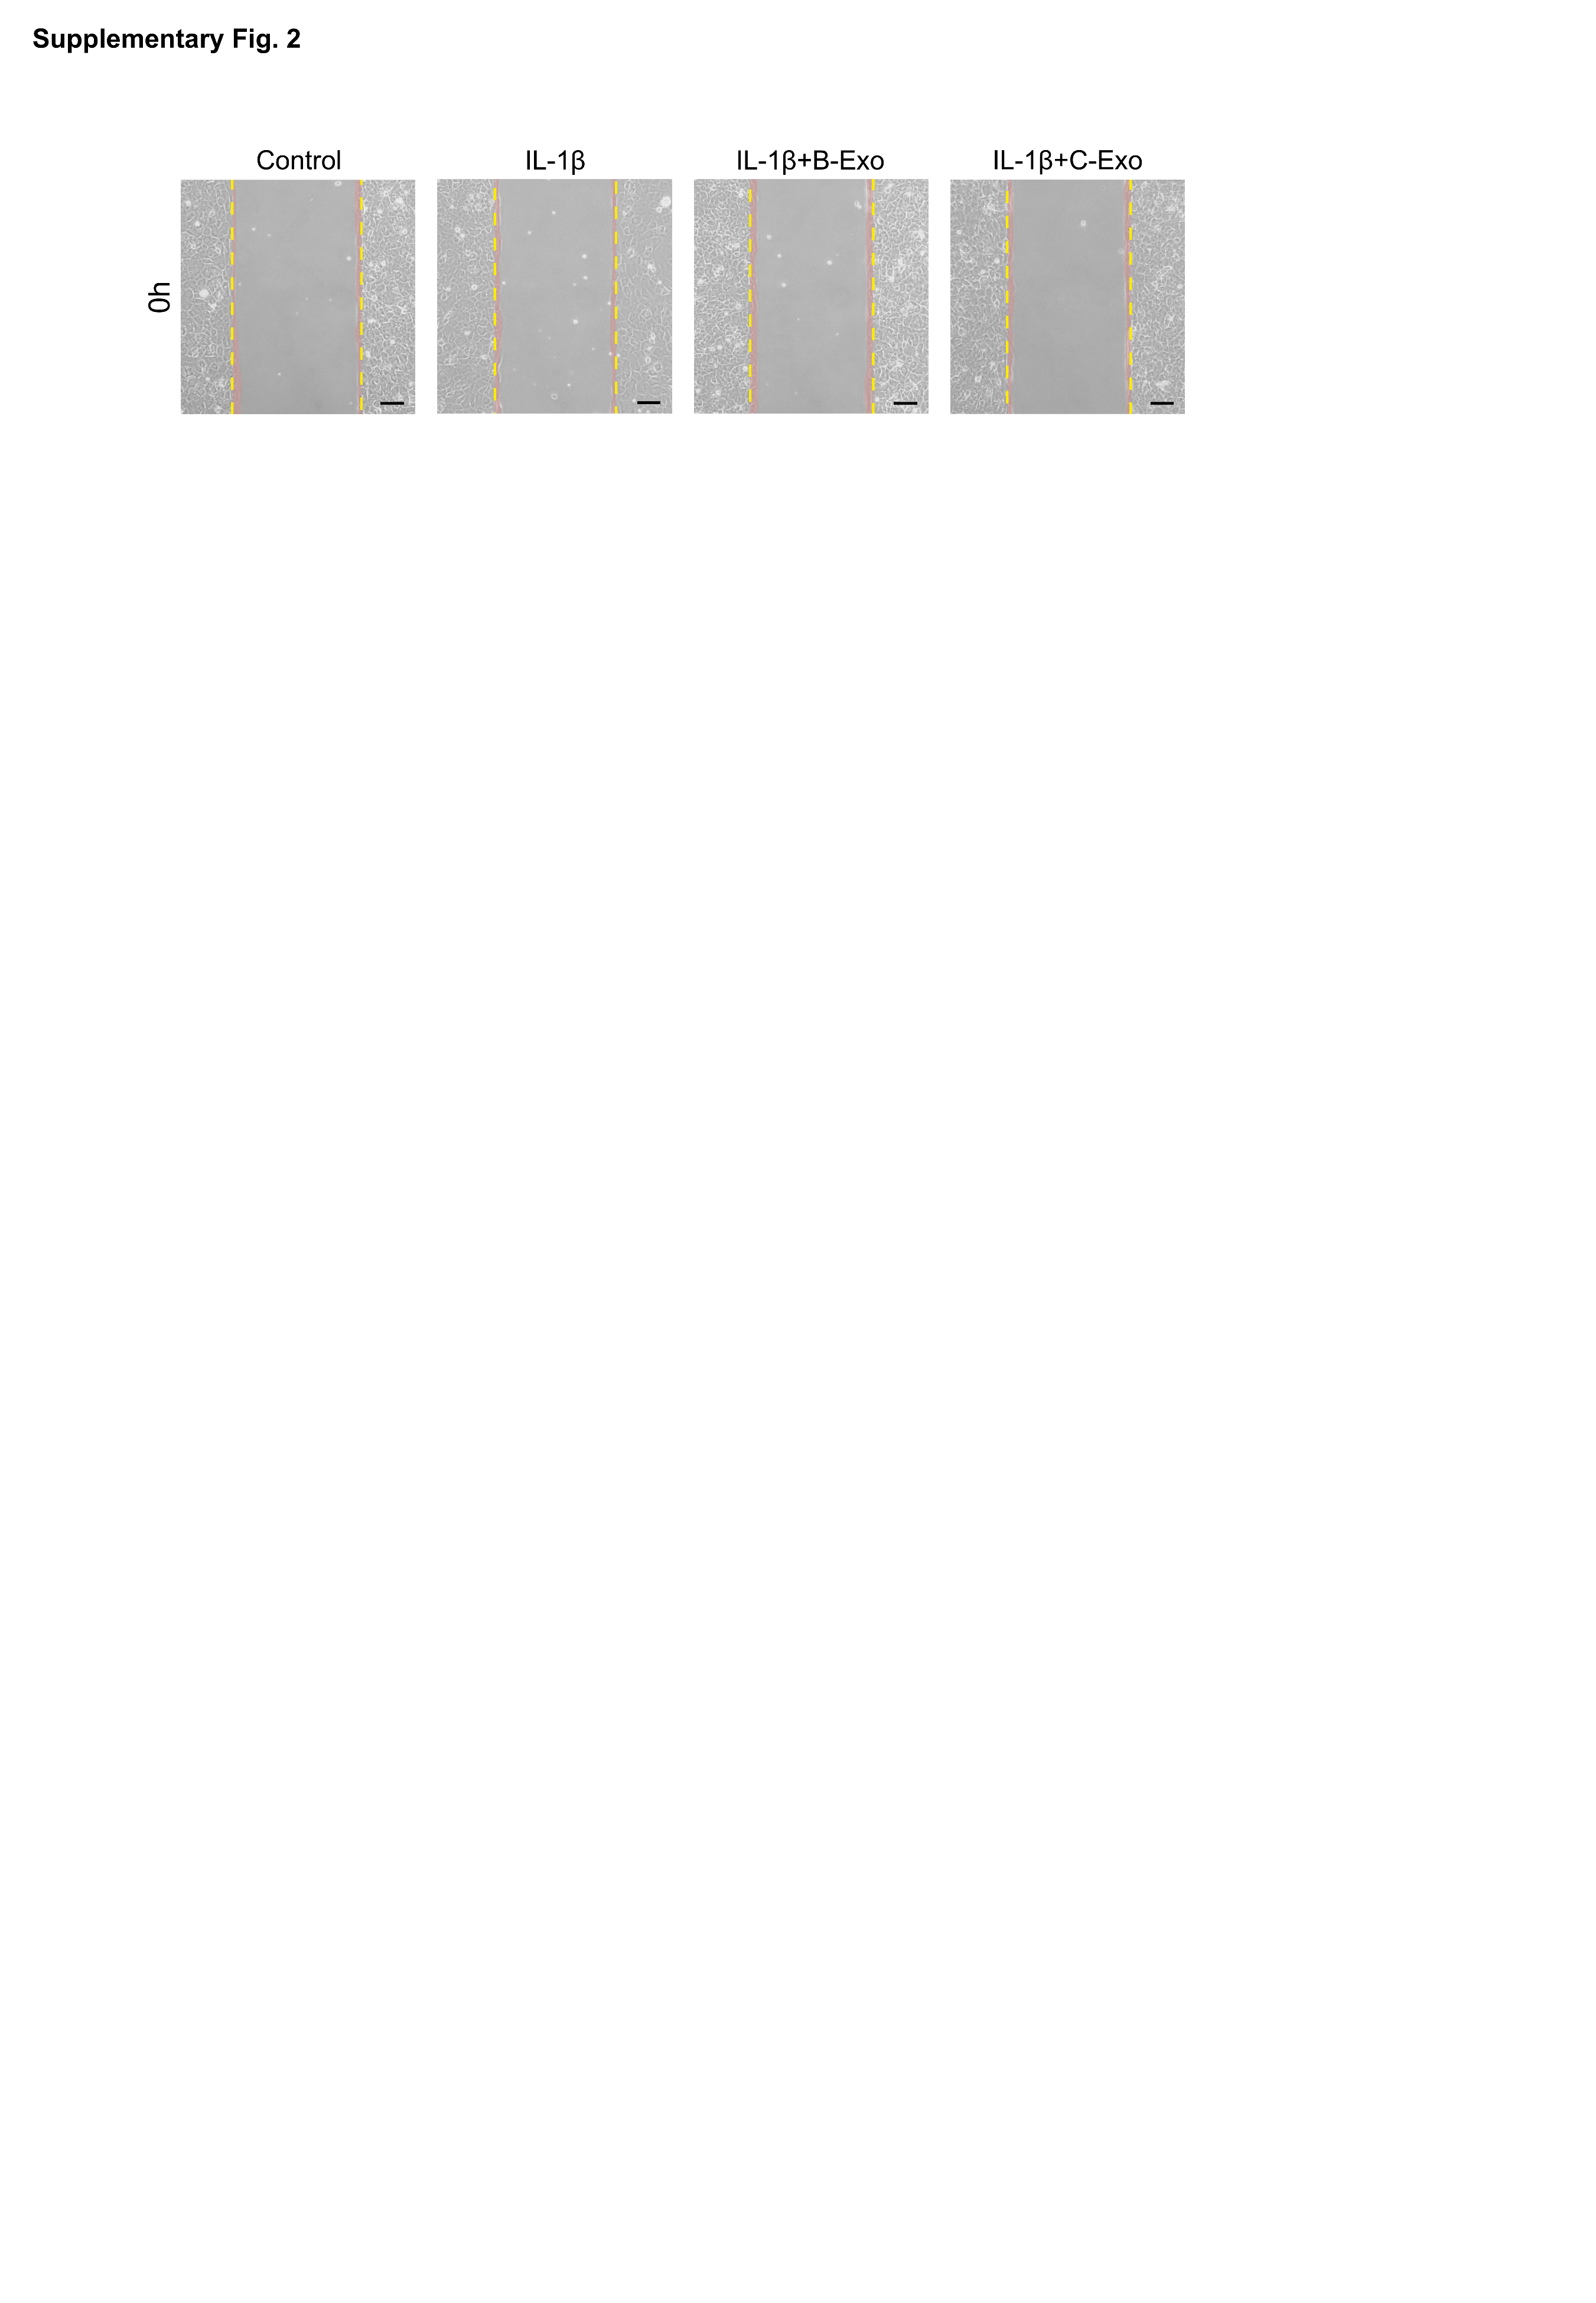
**Supplementary Fig. 3** Representative images of CCs migration assay observed at 0 h, scale bar: 100 μm.


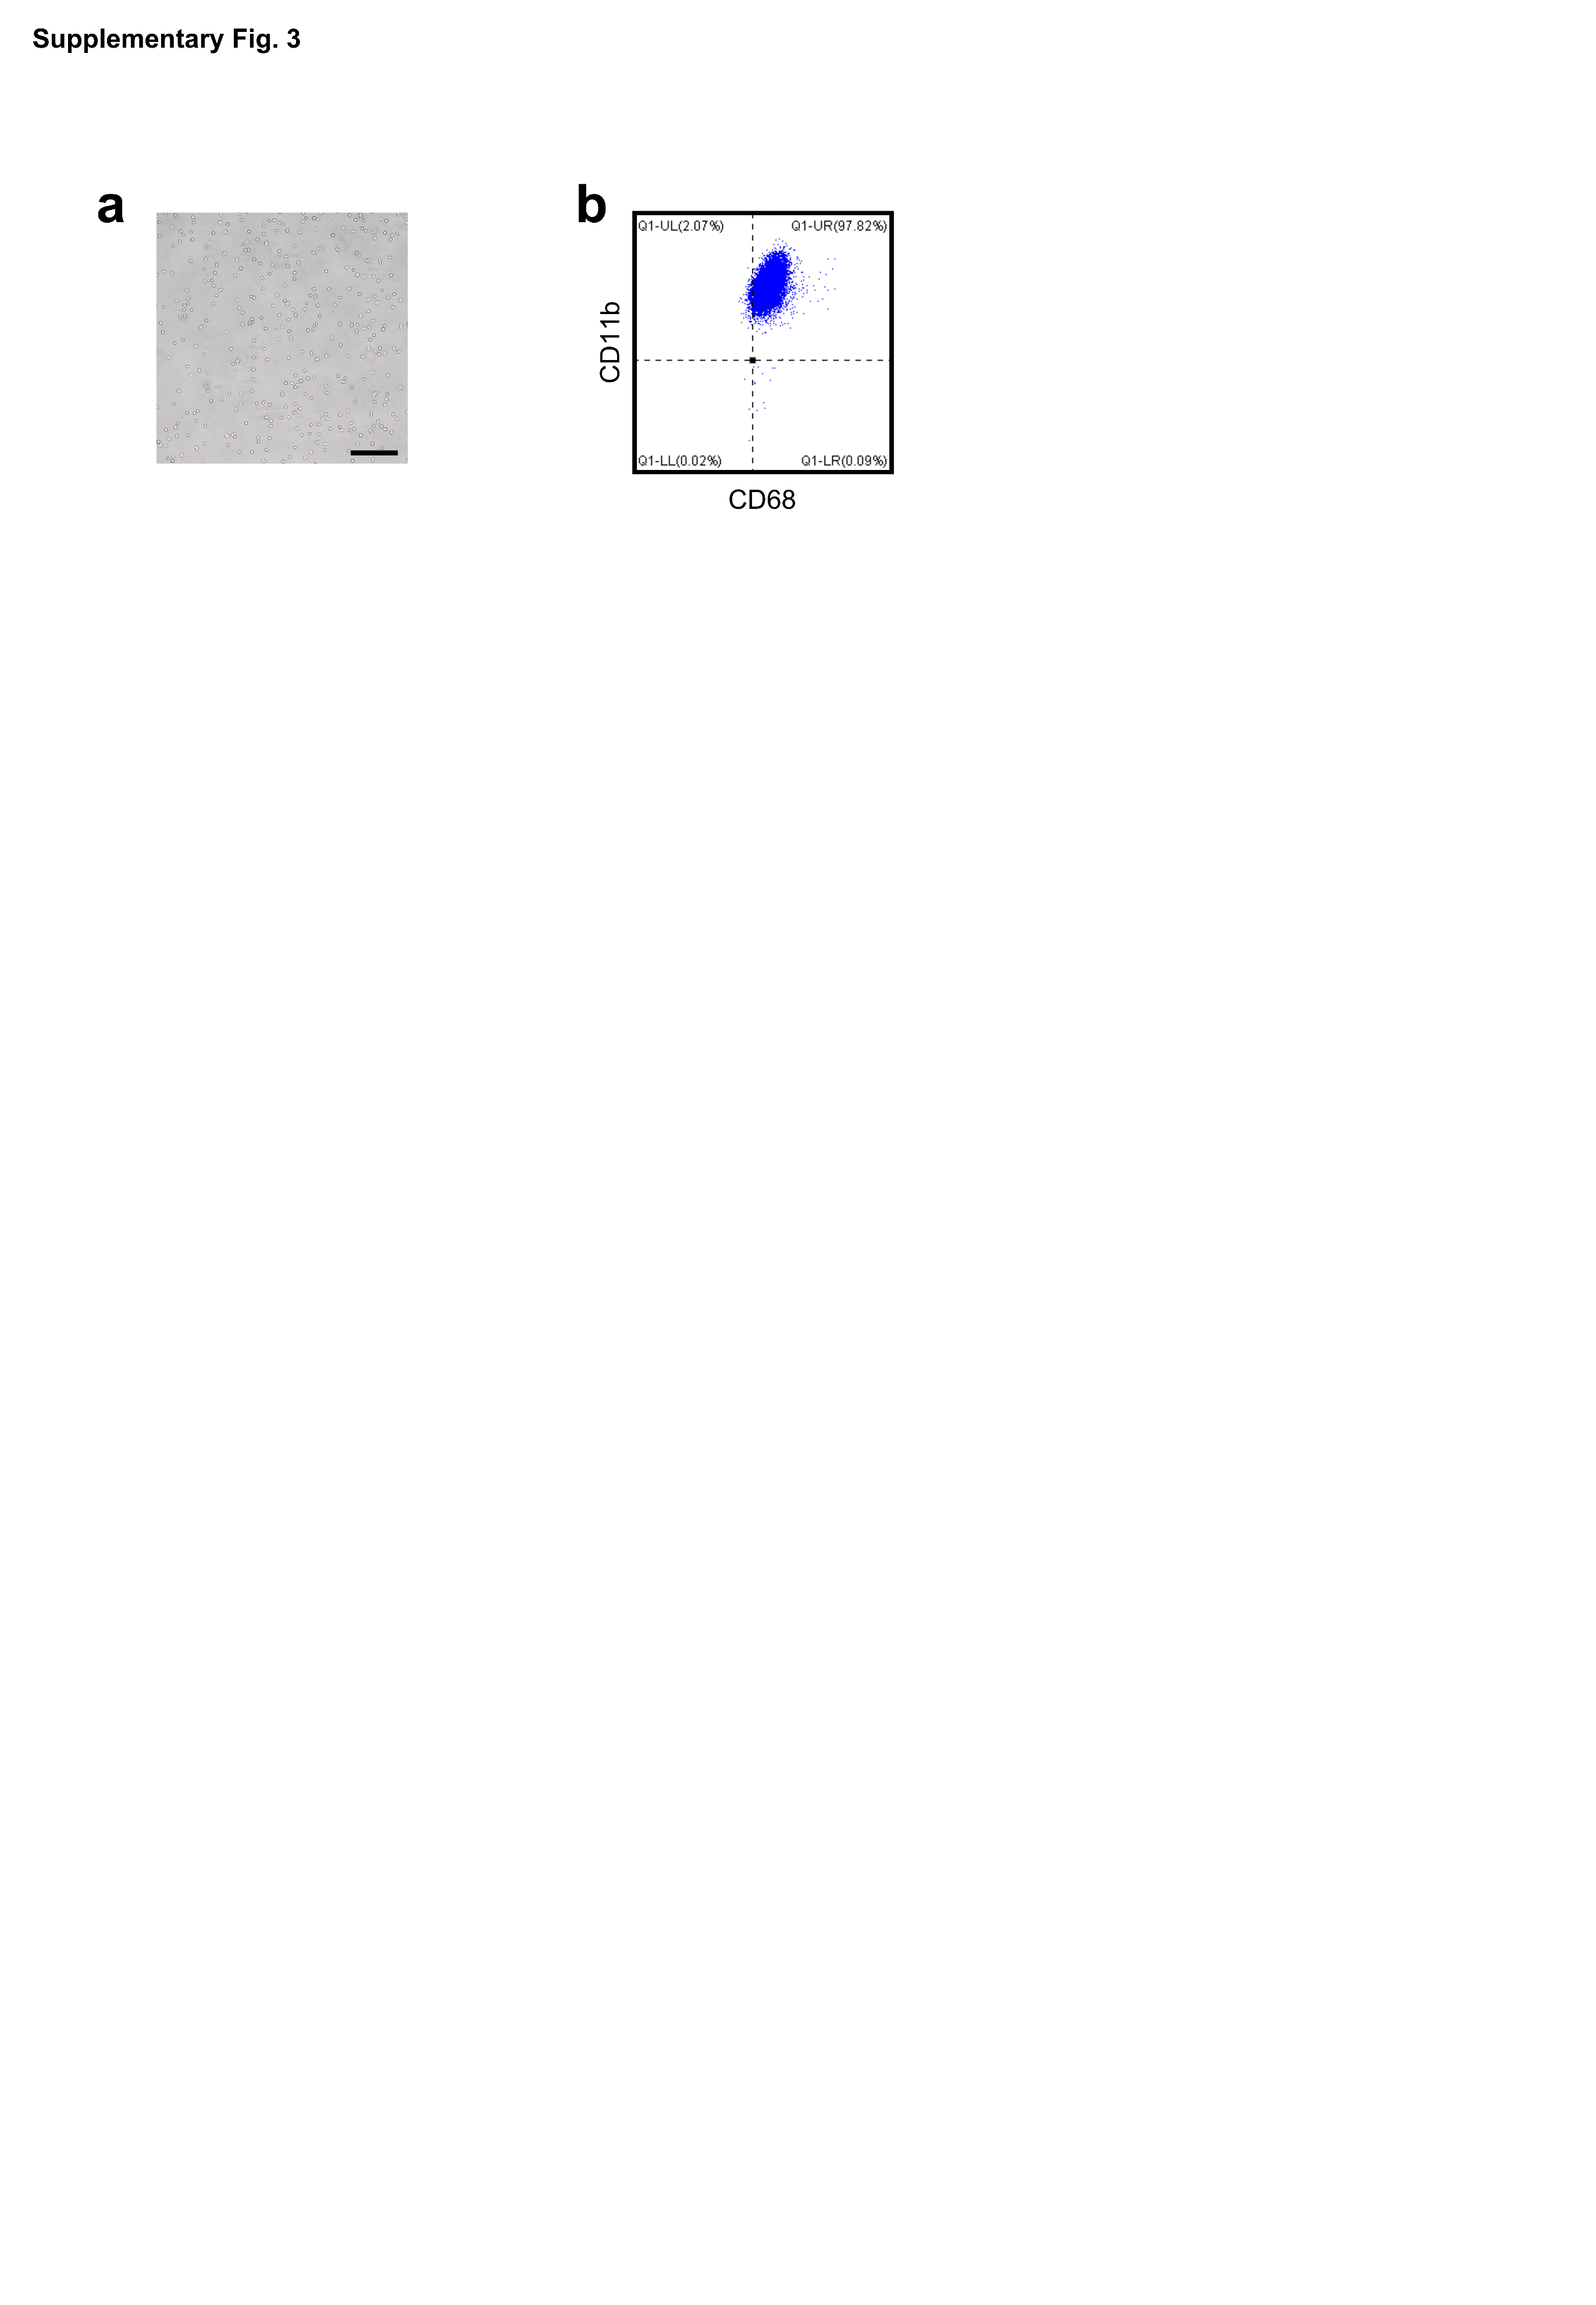


**Supplementary Fig. 4 | Identification of BMDMs. a** Representative morphology of BMDMs, scale bar: 200 μm. **b** Flow cytometric identification of BMDMs.


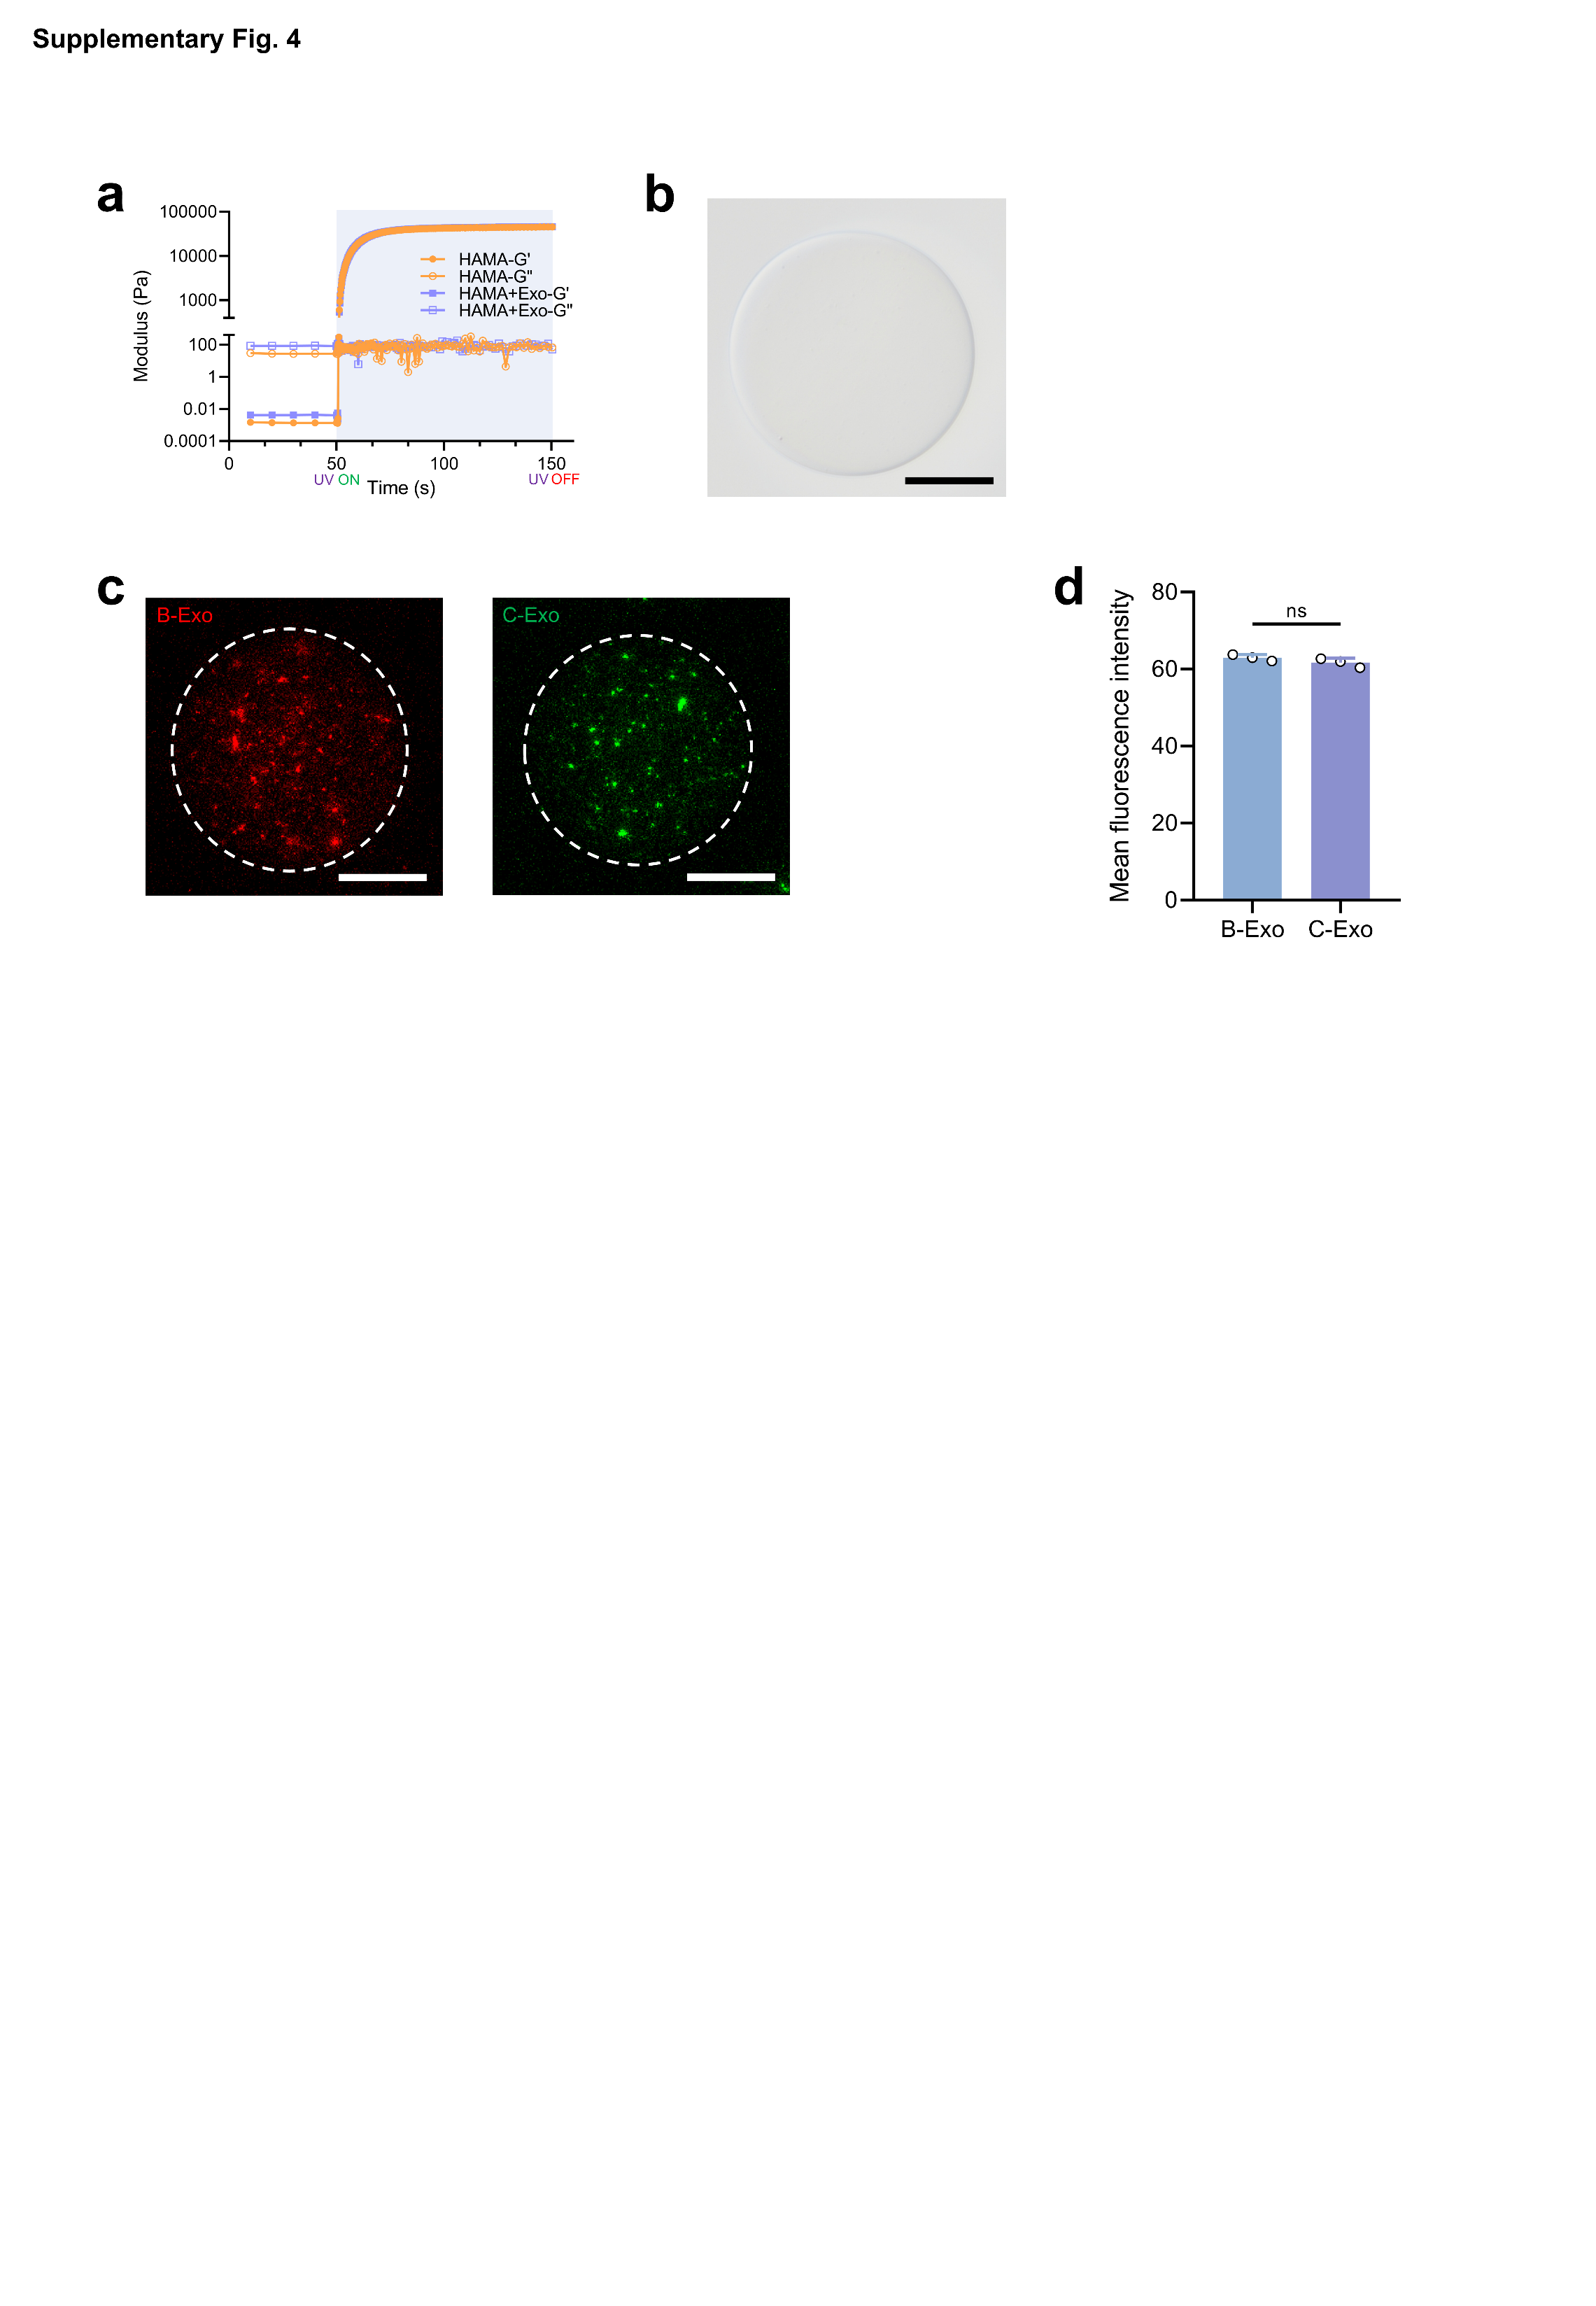


**Supplementary Fig. 5 | Characterization of Exo-loaded microspheres. a** Influence of UV exposure on the storage/loss modulus (G’/G’’) of HAMA and HAMA-Exo. **b** Representative morphology of microsphere in aqueous phase, scale bar: 50 μm. **c** Representative image showing DiI labeled B‐Exo or DiO labeled C‐Exo inside microsphere, respectively, scale bar: 50 μm. **d** Semi-quantification of DiO and DiI fluorescence intensity in BC-Exo-MS. Data are given as mean ± SD, n = 3. Statistical significance was determined by unpaired Student’s t-test.


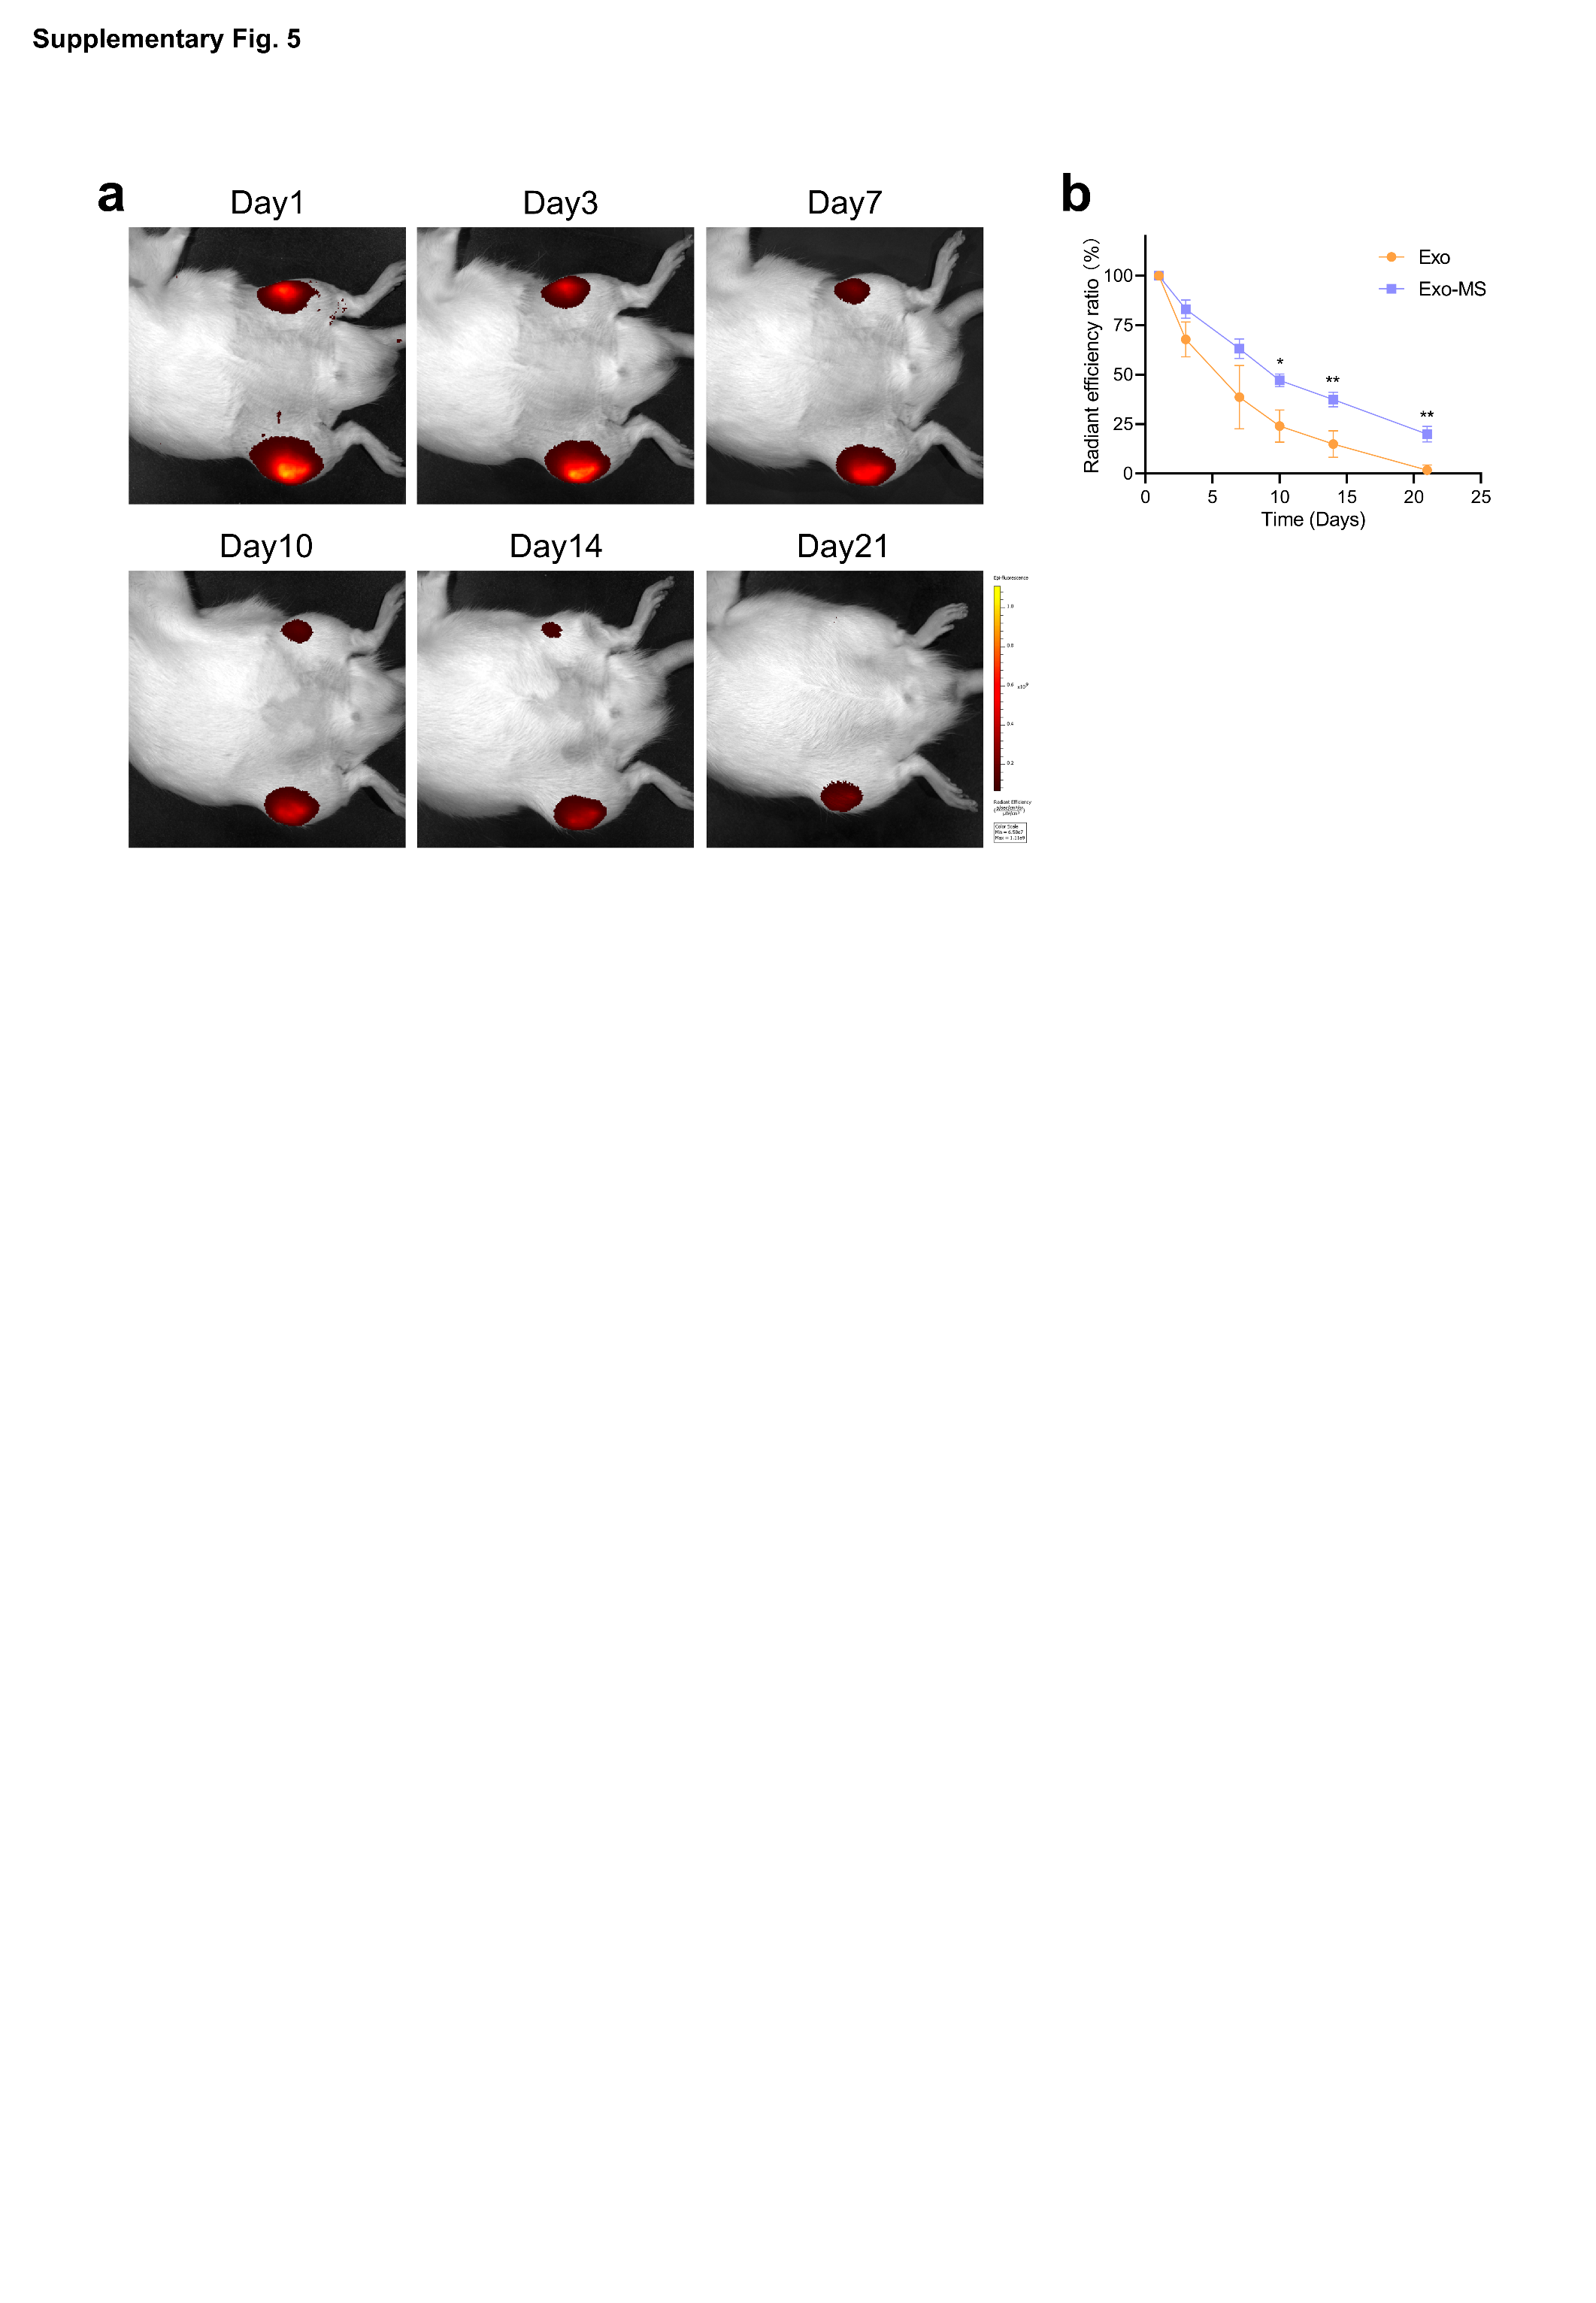
**Supplementary Fig. 6 | Release kinetics of Exo encapsulated in microspheres *in vivo*. a** Representative image of rats after injection with DiR-Exo into left knee joints, with DiR-Exo-MS into contralateral joints. **b** Semi-quantification analysis of fluorescence in rats at different time points. Data are given as mean ± SD, n = 3.


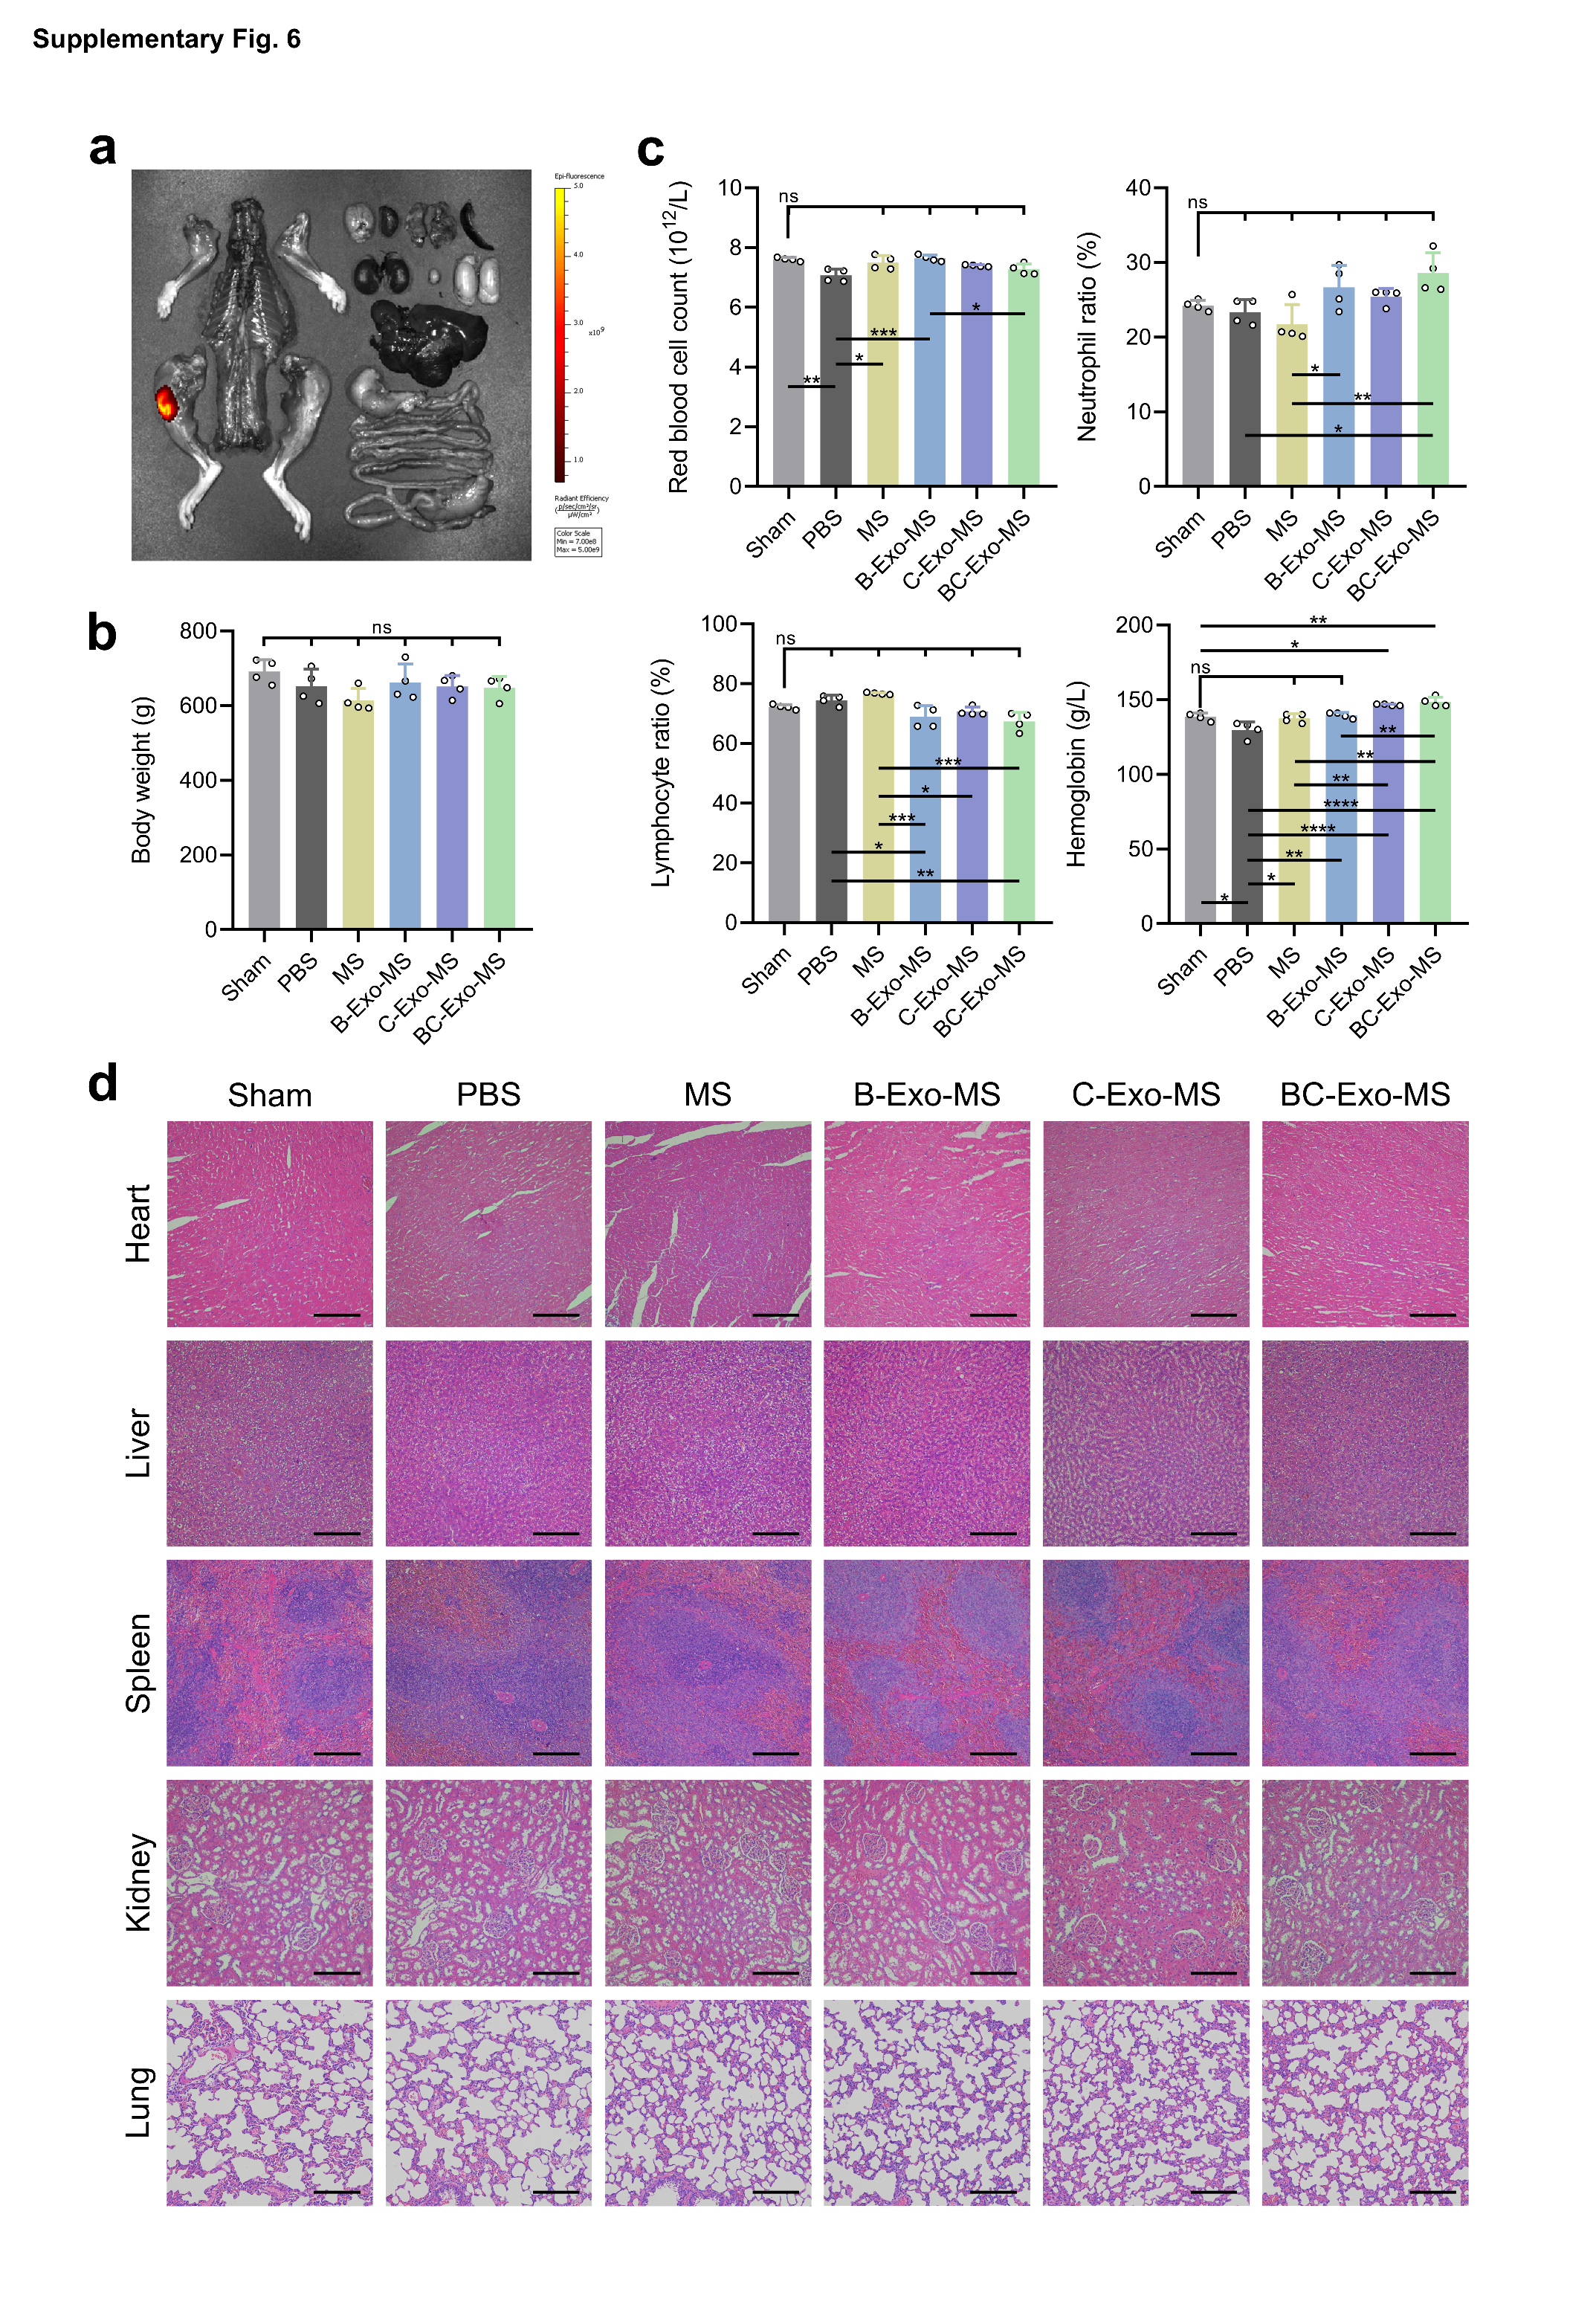
**Supplementary Fig. 7 | Biodistribution and biosafety of Exo-MS.** **a** Representative Image of skeletons and visceral organs of one rat that injected with DiR-labeled Exo-MS into the right knee. **b** Body weight of rats at 12-week. **c** Blood routine (containing red blood cell count, neutrophil ratio, lymphocyte ratio, and hemoglobin level) of rats at 12-week. **d** H&E staining observation of the heart, liver, spleen, kidney, and lung of rats at 12-week, scale bar: 200 μm. Data are given as mean ± SD, n = 4. Statistical significance was determined by one-way ANOVA.


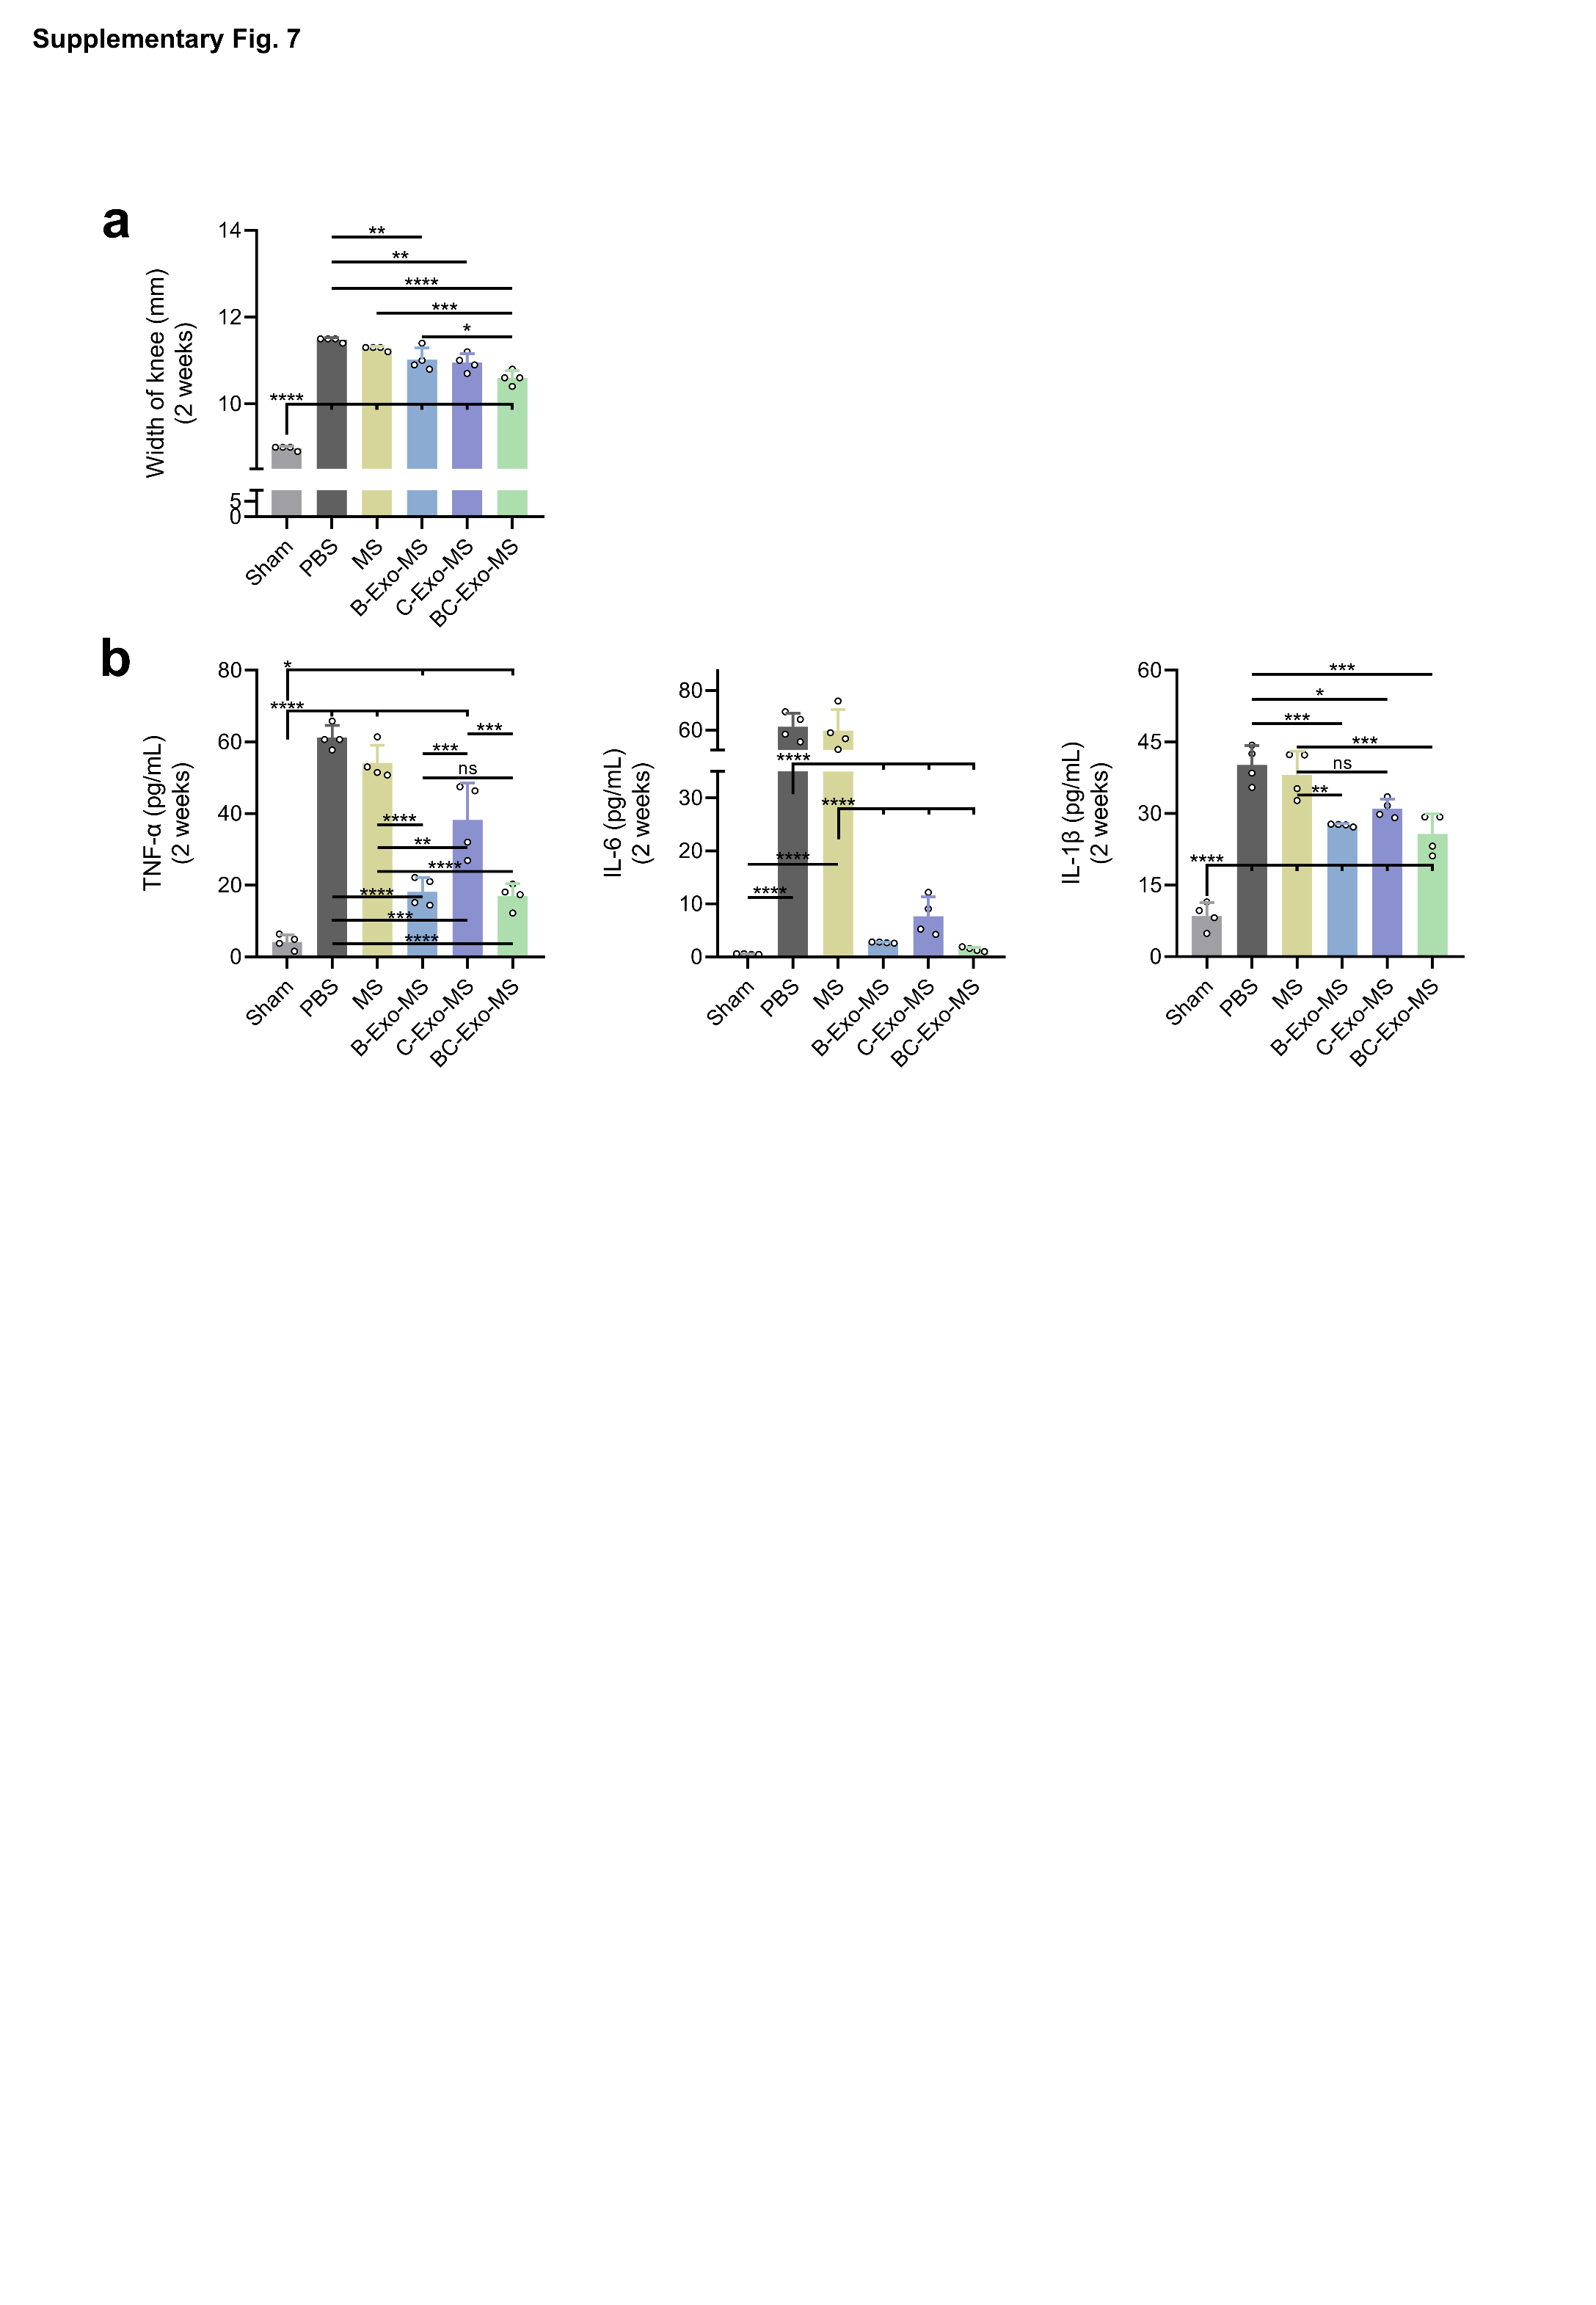


**Supplementary Fig. 8 | The measured factors at 2-week post Exo administration. a, b** The Rats’ knee widths (**a**) and synovial fluid cytokine (TNF-α, IL-6, and IL-1β) levels (**b**) at 2-week. Data are given as mean ± SD, n = 4. Statistical significance was determined by one-way ANOVA.


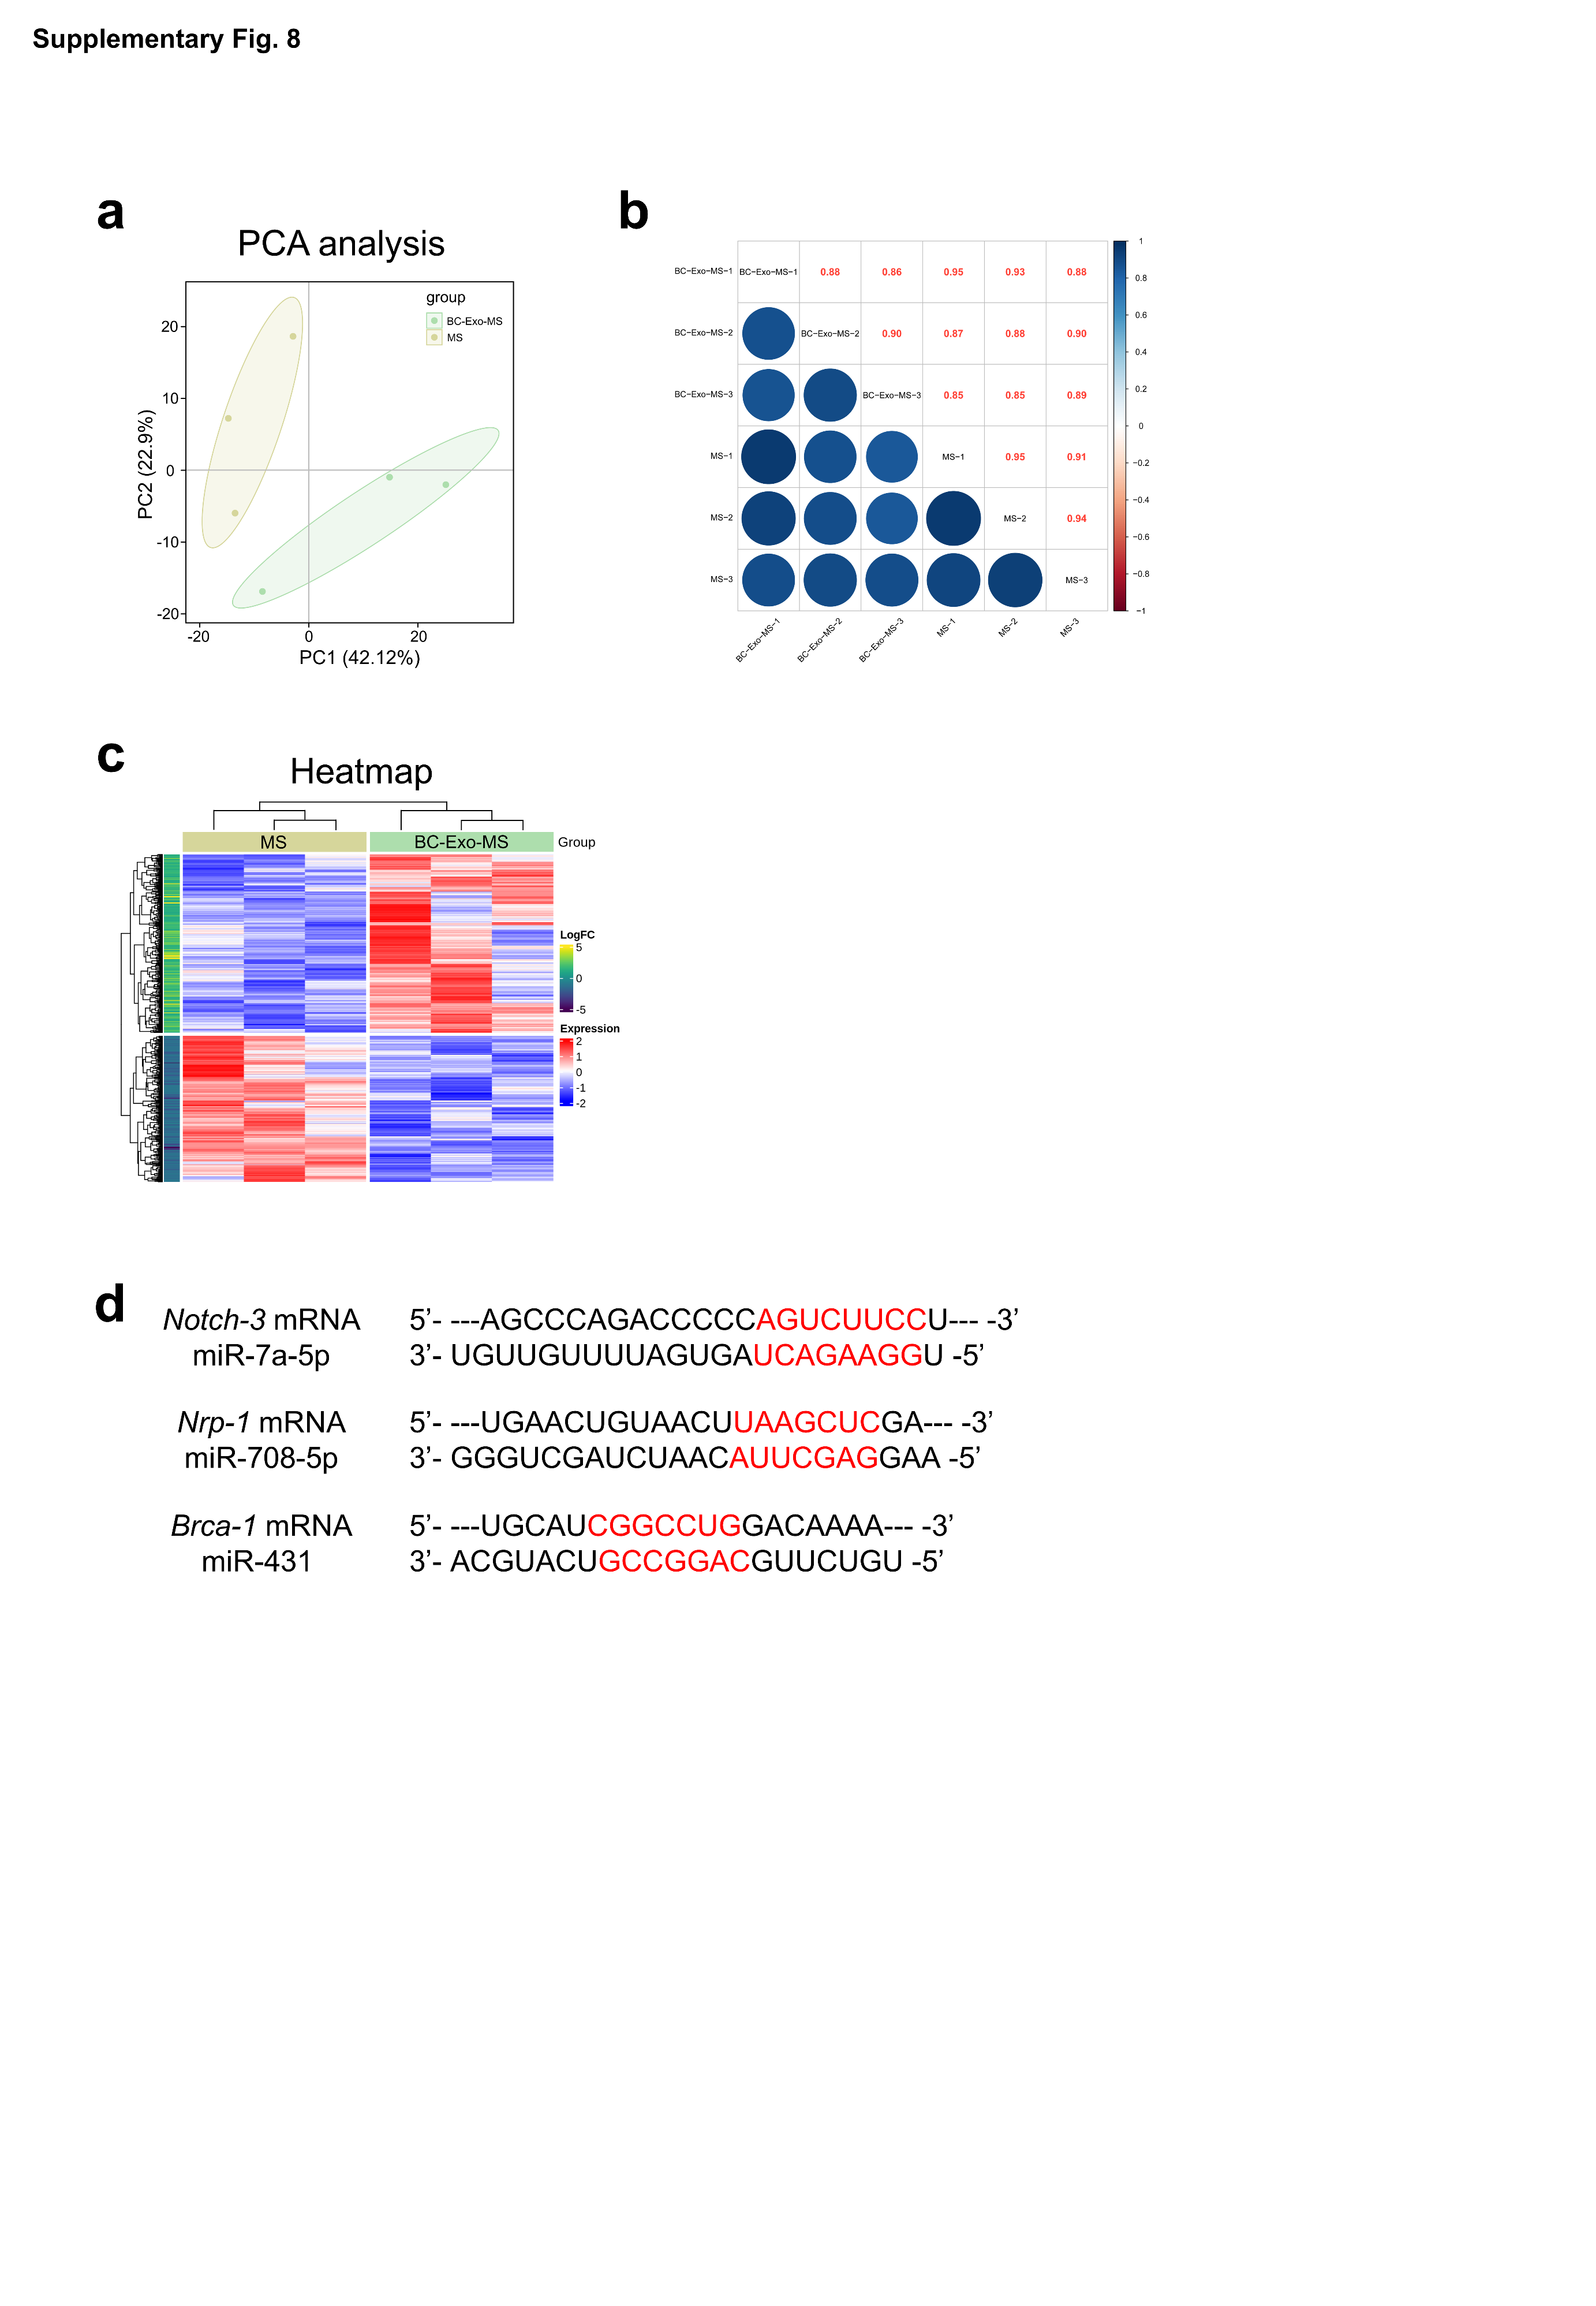


**Supplementary Fig. 9 | Results of transcriptomic analysis. a** PCA plot of transcriptomics data between BC-Exo-MS and MS, n = 3. **b** Pearson’s correlation analysis of transcriptomics results. **c** Heat map of the differentially expressed mRNAs between BC-Exo-MS and MS, n = 3. **d** Base complementarity of miRNA to its target mRNA.


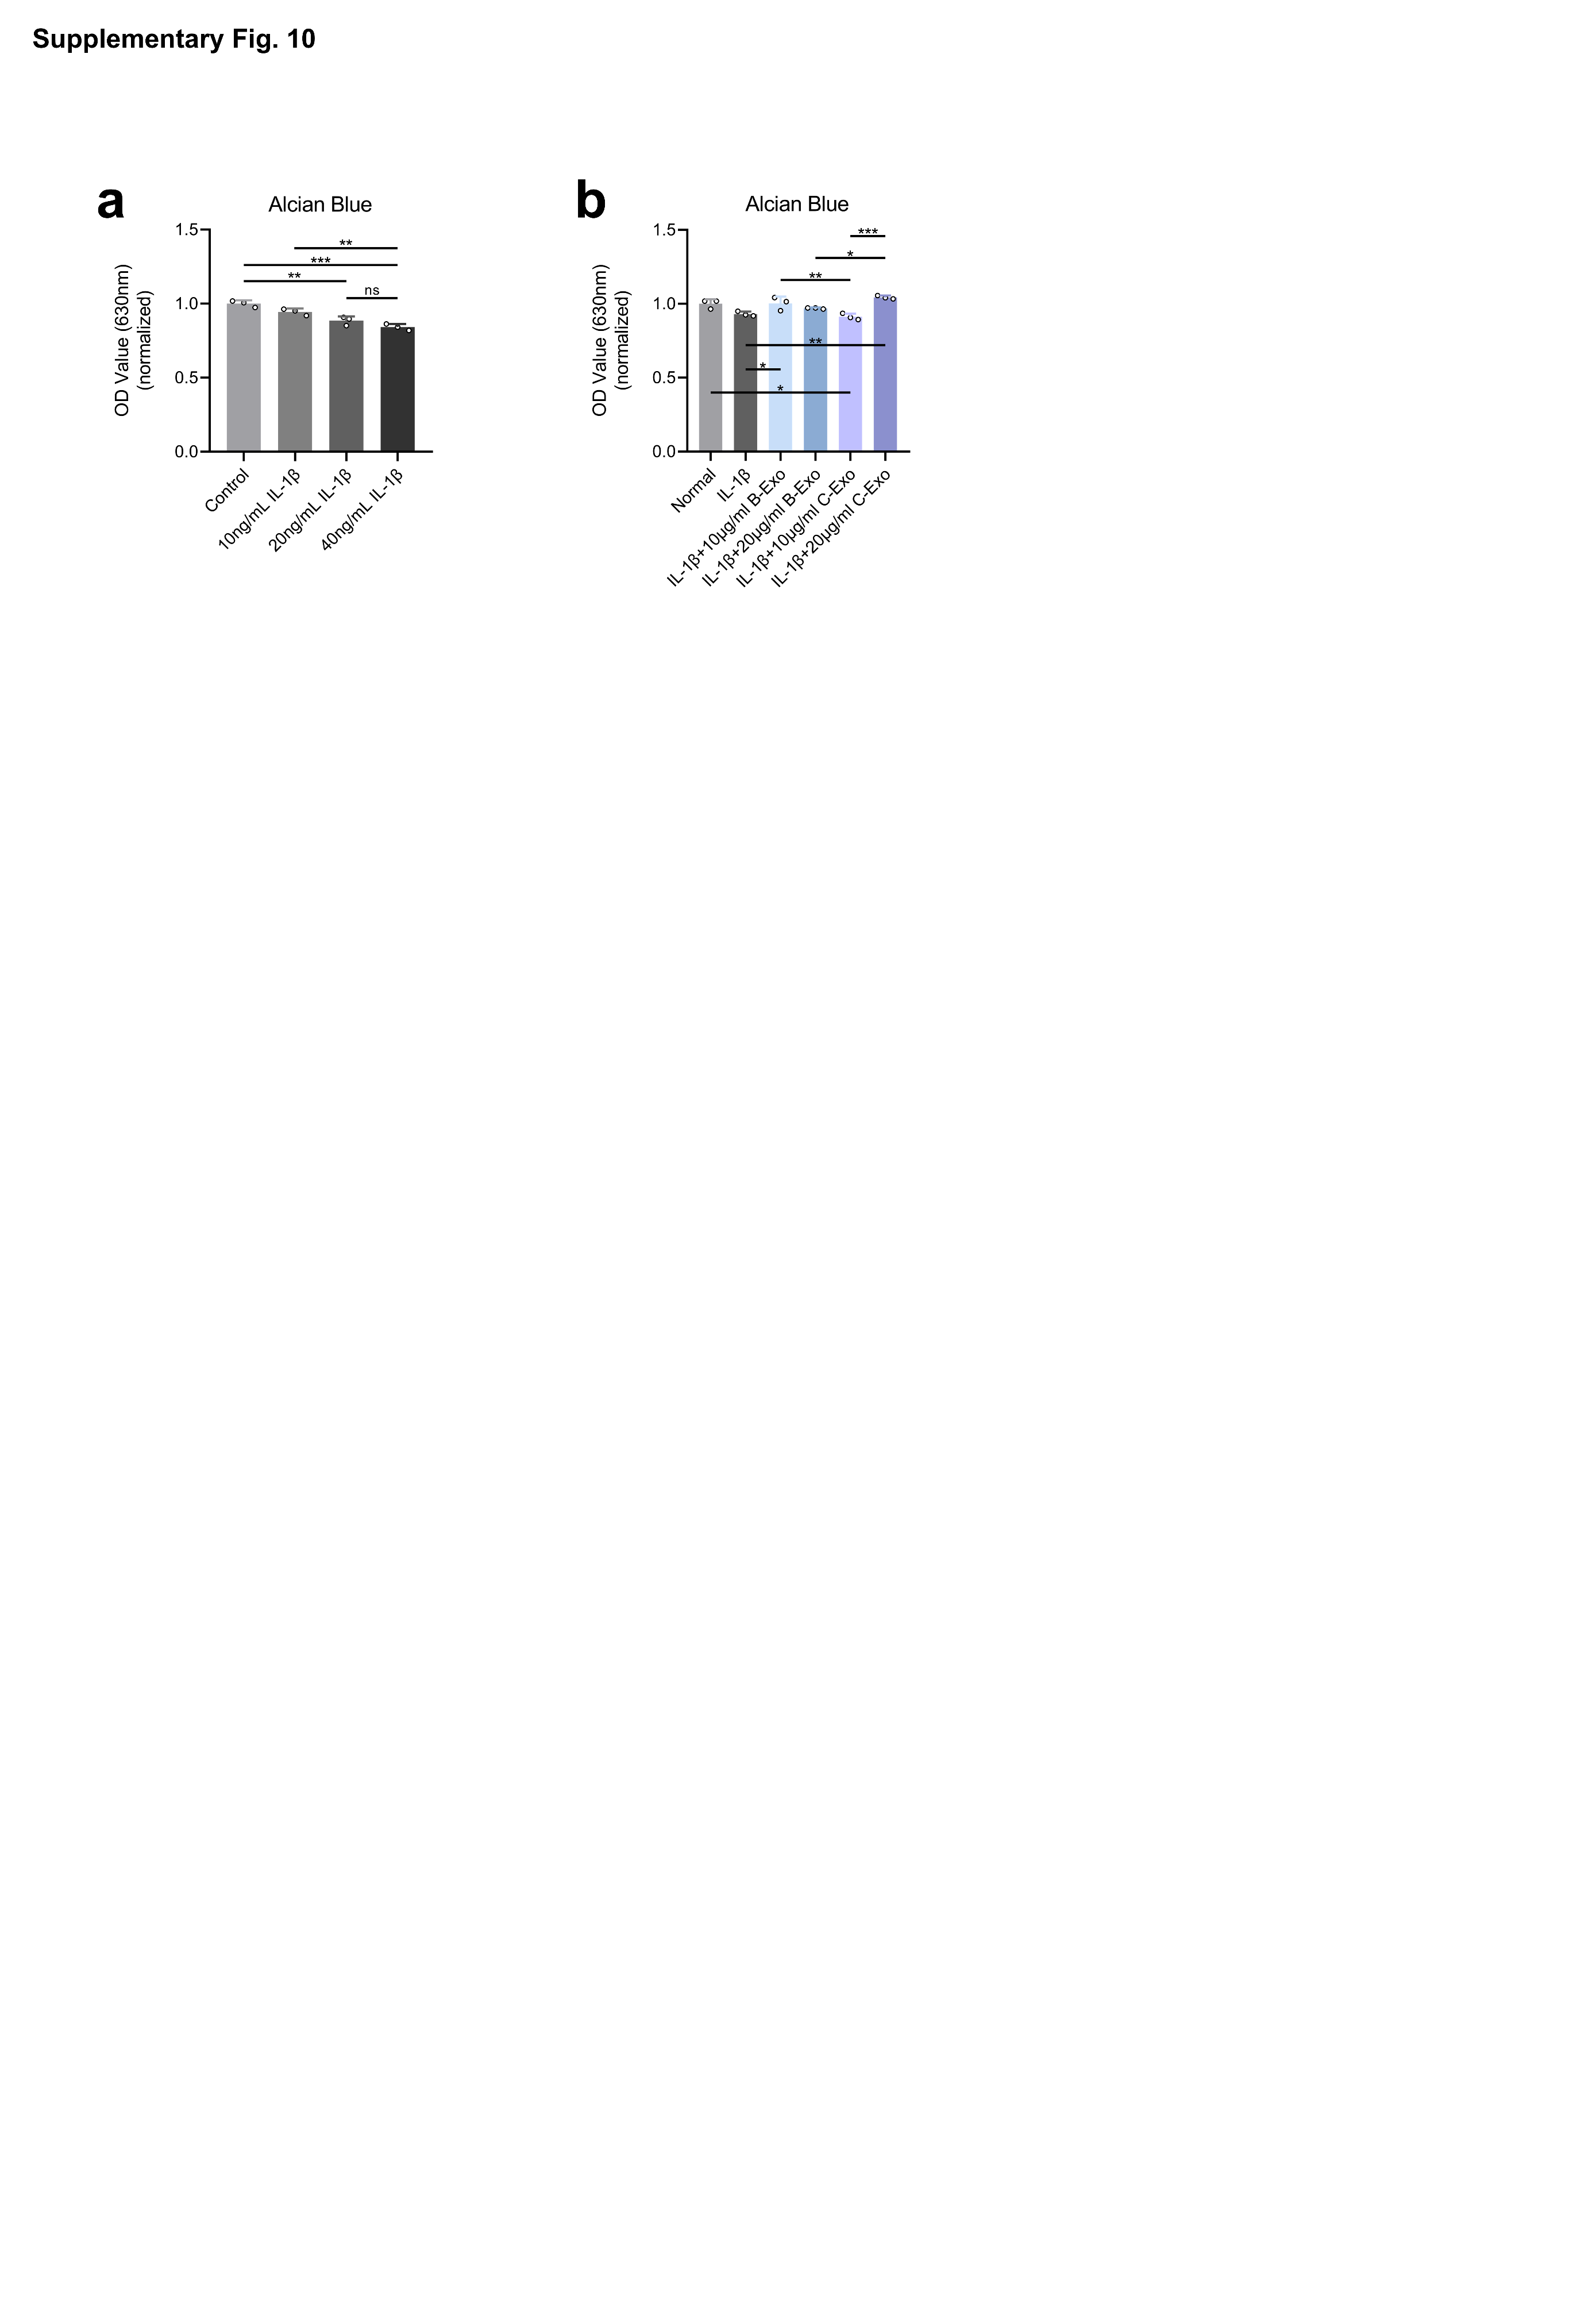


**Supplementary Fig. 10 | The effects of different doses of IL-1β and Exo on CCs. a** Quantitative analysis of Alcian Blue staining of CCs treated with different doses of IL-1β. **b** Quantitative analysis of Alcian Blue staining of CCs treated with different doses of B-Exo or C-Exo. Data are given as mean ± SD, n = 3. Statistical significance was determined by one-way ANOVA.
